# Supplementary material for: Cu-Mediated 2,2,2-trifluoroethylation of terminal alkynes using 1,1-dichloro-2,2,2-trifluoroethane (HCFC-123)
Source: Royal Society of Chemistry journal article supplement (doi:10.1039/c5qo00210a), 2015-01-01

## Cu-mediated 2,2,2-Trifluoroethylation of Terminal Alkynes using

### 1,1-Dichloro-2,2,2-trifluoroethane (HCFC-123)

En-Jian Han,<sup>a</sup> Yan Sun,<sup>a</sup> Qian Shen,<sup>b</sup> Qing-Yun Chen,<sup>\*a</sup> Yong Guo<sup>\*a</sup> and  
Yan-Gen Huang<sup>b</sup>

<sup>a</sup> Key Laboratory of Organofluorine Chemistry, Shanghai Institute of Organic Chemistry, Chinese Academy of Sciences, 345 Lingling Road, Shanghai 200032, China. E-mail: chenqy@sioc.ac.cn and yguo@sioc.ac.cn

<sup>b</sup> College of Chemistry, Chemical Engineering and Biotechnology, Donghua University, 2999 North Renmin Road, Shanghai 201620, China.

## Support Information

### Table of contents

|                                                                                                                                                                                         |          |
|-----------------------------------------------------------------------------------------------------------------------------------------------------------------------------------------|----------|
| <b>General information:</b> .....                                                                                                                                                       | <b>1</b> |
| <b>Screening conditions for reactions of phenylacetylene 2a with 1,1-Dichloro-2,2,2-trifluoroethane (HCFC-123) in the presence of various metals and salts (Table 1S and 2S).</b> ..... | <b>2</b> |
| <b>Isotopic labeling experiments</b> .....                                                                                                                                              | <b>4</b> |
| <b>Competitive reaction between alkyne 2a and alkene 4</b> .....                                                                                                                        | <b>6</b> |
| <b>Spectroscopic data for products</b> .....                                                                                                                                            | <b>7</b> |

**General information:** NMR spectra were obtained on 300 or 400 MHz spectrometers and recorded at 25 °C. Chemical shifts for <sup>1</sup>H NMR spectra are reported in ppm downfield from TMS, chemical shifts for <sup>13</sup>C NMR spectra are recorded in ppm relative to internal chloroform (δ 77.0 ppm for <sup>13</sup>C), and chemical shifts for <sup>19</sup>F NMR are reported in ppm downfield from fluorotrichloromethane (CFCl<sub>3</sub>). Coupling constants (*J*) are reported in hertz. The terms m, s, d, t, q and br refer to multiplet, singlet, doublet, triplet, quartet and broad, respectively. <sup>13</sup>C NMR was broad-band

decoupled from hydrogen nuclei.  $^{19}\text{F}$  NMR yield was determined by  $^{19}\text{F}$  NMR using benzotrifluoride as an internal standard before working up the reaction. Infrared spectra (IR) were recorded with an infrared spectrometer; absorbance frequencies are given at maximum intensity in  $\text{cm}^{-1}$ . The mass analyzer type used for the HRMS is time-of-flight mass spectrometry (TOF-MS) or Fourier transform ion cyclotron resonance mass spectrometry (FTICR-MS). Column chromatography was performed using silica gel (mesh 300–400).

**Screening conditions for reactions of phenylacetylene **2a** with 1,1-Dichloro-2,2,2-trifluoroethane (HCFC-123) in the presence of various metals and salts (Table 1S and 2S).**

**Table 1S:** Screening of conditions for copper-mediated 2,2,2-trifluoroethylation of **2a** with **1**<sup>a</sup>

$$\text{Ph}-\text{C}\equiv\text{C}-\text{H} + \text{CF}_3\text{CHCl}_2 \xrightarrow[\text{solvent}]{\substack{x \text{ mmol Cu} \\ z \text{ mmol amine}}} \text{Ph}-\text{C}\equiv\text{C}-\text{CH}_2\text{CF}_3$$

$\underset{1 \text{ mmol}}{\mathbf{2a}}$        $\underset{y \text{ mmol}}{\mathbf{1}}$        $\mathbf{3a}$

| Entry     | amine                           | <b>2a</b> : <b>1</b> :Cu:amine | Solvent                           | Temp. (°C) | Yield (%) <sup>b</sup> |
|-----------|---------------------------------|--------------------------------|-----------------------------------|------------|------------------------|
| 1         | Et <sub>2</sub> NH              | 1:1:2:2                        | DMF                               | 70         | N.R                    |
| 2         | Et <sub>2</sub> NH              | 1:1:2:2                        | THF                               | 70         | N.R                    |
| 3         | Et <sub>2</sub> NH              | 1:1:2:2                        | CH <sub>3</sub> NO <sub>2</sub>   | 70         | N.R                    |
| 4         | Et <sub>2</sub> NH              | 1:1:2:2                        | CH <sub>3</sub> CN                | 70         | 5                      |
| 5         | Et <sub>2</sub> NH              | 1:1:2:2                        | DCE                               | 70         | 10                     |
| 6         | Et <sub>2</sub> NH              | 1:1:3:3                        | DCE                               | 70         | 65                     |
| 7         | Et <sub>2</sub> NH              | 1:1:4:4                        | DCE                               | 70         | 63                     |
| 8         | Et <sub>2</sub> NH              | 1:2:3:3                        | DCE                               | 70         | 73                     |
| 9         | Et <sub>2</sub> NH              | 1:2:1:3                        | DCE                               | 70         | 74                     |
| 10        | Et <sub>2</sub> NH              | 1:2:1:3                        | DCE                               | 60         | 42                     |
| 11        | Et <sub>2</sub> NH              | 1:2:1:3                        | DCE                               | 80         | 46                     |
| 12        | Et <sub>2</sub> NH              | 1:-:1:3 <sup>c</sup>           | CF <sub>3</sub> CHCl <sub>2</sub> | 70         | 55                     |
| <b>13</b> | <b>Et<sub>2</sub>NH</b>         | <b>1:2:2:3</b>                 | <b>DCE</b>                        | <b>70</b>  | <b>77</b>              |
| 14        | <sup>n</sup> Pr <sub>2</sub> NH | 1:2:2:3                        | DCE                               | 70         | 64                     |

|    |                                 |         |     |    |                 |
|----|---------------------------------|---------|-----|----|-----------------|
| 15 | <sup>n</sup> Bu <sub>2</sub> NH | 1:2:2:3 | DCE | 70 | 63              |
| 16 | diallylamine                    | 1:2:2:3 | DCE | 70 | 30              |
| 17 | DMEA                            | 1:2:2:3 | DCE | 70 | 44 <sup>d</sup> |
| 18 | piperidine                      | 1:2:2:3 | DCE | 70 | 7               |
| 19 | azolidine                       | 1:2:2:3 | DCE | 70 | trace           |
| 20 | <sup>i</sup> Pr <sub>2</sub> NH | 1:2:2:3 | DCE | 70 | N.R             |
| 21 | Ph <sub>2</sub> NH              | 1:2:2:3 | DCE | 70 | N.R             |
| 22 | EtNH <sub>2</sub>               | 1:2:2:3 | DCE | 70 | N.R             |
| 23 | Et <sub>3</sub> N               | 1:2:2:3 | DCE | 70 | N.R             |
| 24 | TEDA                            | 1:2:2:3 | DCE | 70 | N.R             |

<sup>a</sup>The reactions were carried out with **2** (1 mmol) and **1** (x mmol) in the presence of Cu powder (y mmol) and amine (z mmol) in 2 mL of solvent in a sealed tube under a nitrogen atmosphere. <sup>b</sup>Yields were determined by <sup>19</sup>F NMR spectroscopy using benzotrifluoride as an internal standard. <sup>c</sup>**1** was used as reactant and also as a sole solvent. <sup>d</sup>An allene product was found with the alkyne product.

**Table 2S:** Screening conditions for the reactions of **2a** with **1** mediated by various metals and salts<sup>a</sup>

| $\text{Ph}-\text{C}\equiv\text{C}-\text{H} + \text{CF}_3\text{CHCl}_2 \xrightarrow[\text{DCE, 70}^\circ\text{C}]{\substack{2 \text{ mmol metal} \\ 3 \text{ mmol Et}_2\text{NH}}} \text{Ph}-\text{C}\equiv\text{C}-\text{CH}_2\text{CF}_3$ |                   |                        |
|--------------------------------------------------------------------------------------------------------------------------------------------------------------------------------------------------------------------------------------------|-------------------|------------------------|
| entry                                                                                                                                                                                                                                      | Metal             | Yield (%) <sup>b</sup> |
| 1                                                                                                                                                                                                                                          | Zn                | NR                     |
| 2                                                                                                                                                                                                                                          | Mg                | NR                     |
| 3                                                                                                                                                                                                                                          | Fe                | NR                     |
| 4 <sup>c</sup>                                                                                                                                                                                                                             | CuI/Zn            | <10                    |
| 5                                                                                                                                                                                                                                          | CuCl              | <10                    |
| 6                                                                                                                                                                                                                                          | CuI               | <10                    |
| 7                                                                                                                                                                                                                                          | CuBr <sub>2</sub> | <10                    |
| 8                                                                                                                                                                                                                                          | FeCl <sub>2</sub> | NR                     |

<sup>a</sup>The reactions were carried out with **2a** (102 mg, 1 mmol), **1** (306 mg, 2 mmol), metal (1 mmol), and Et<sub>2</sub>NH (219 mg, 3 mmol) in 2 mL of DCE at 70 °C for 8h in a sealed tube under a nitrogen atmosphere. <sup>b</sup>Yields were determined by <sup>19</sup>F NMR spectroscopy using benzotrifluoride as an internal standard. <sup>c</sup>CuI (19.1 mg, 10% mol), Zn (65 mg, 1 mmol).

### Isotopic labeling experiments

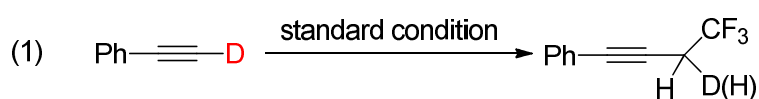

64% (D/H=18:82)

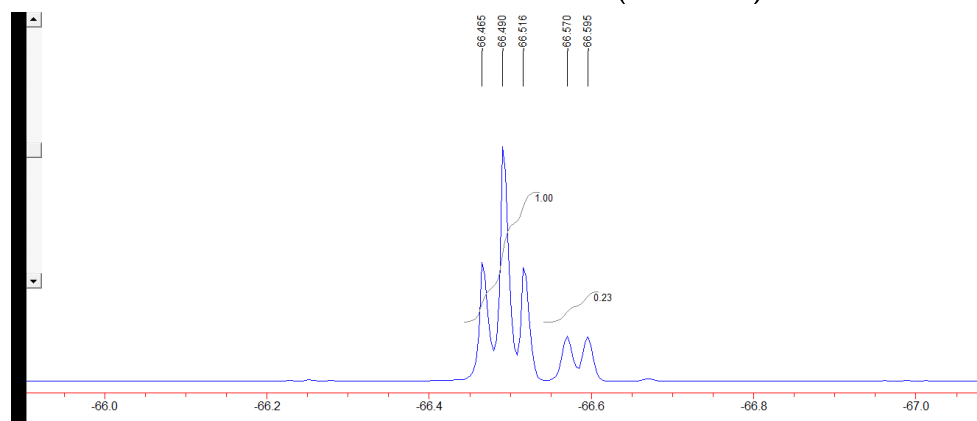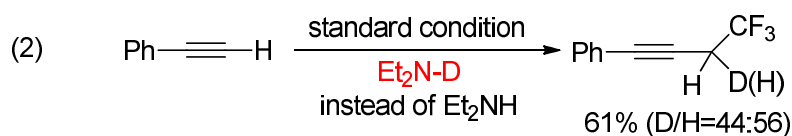

61% (D/H=44:56)

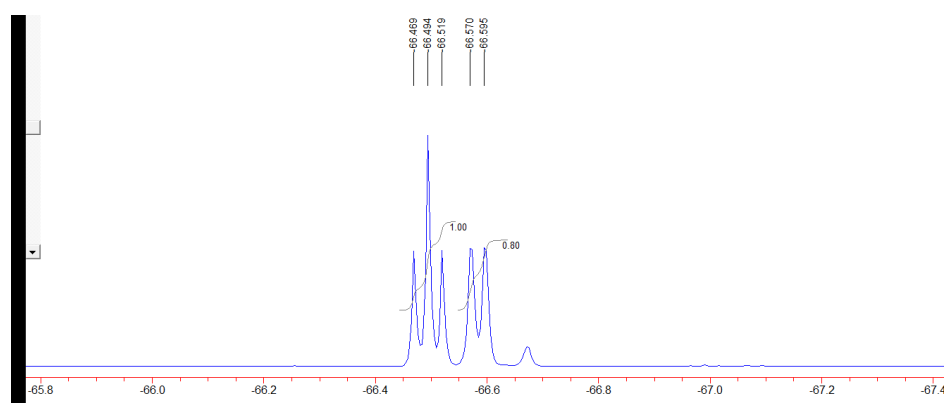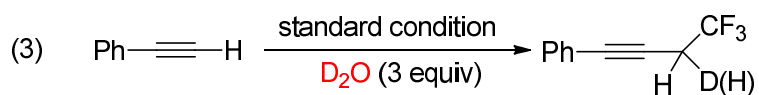

59% (D/H=38:62)

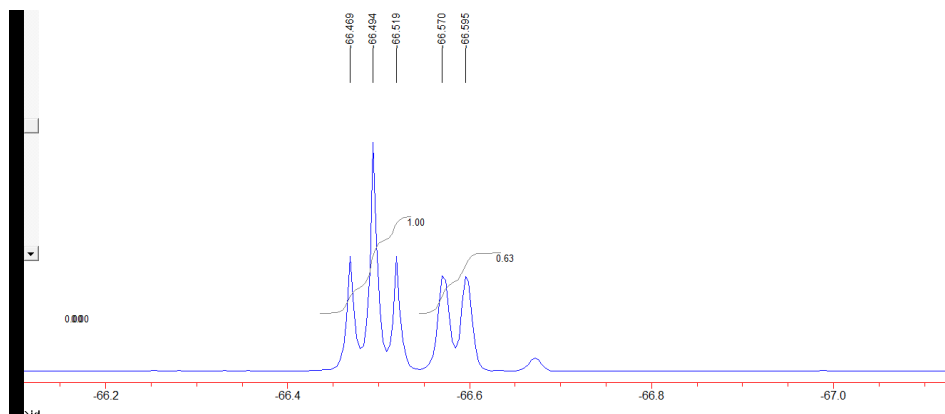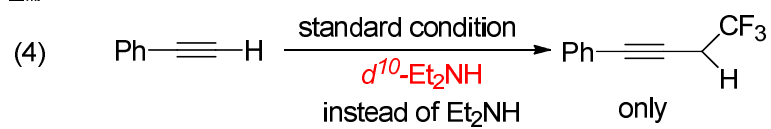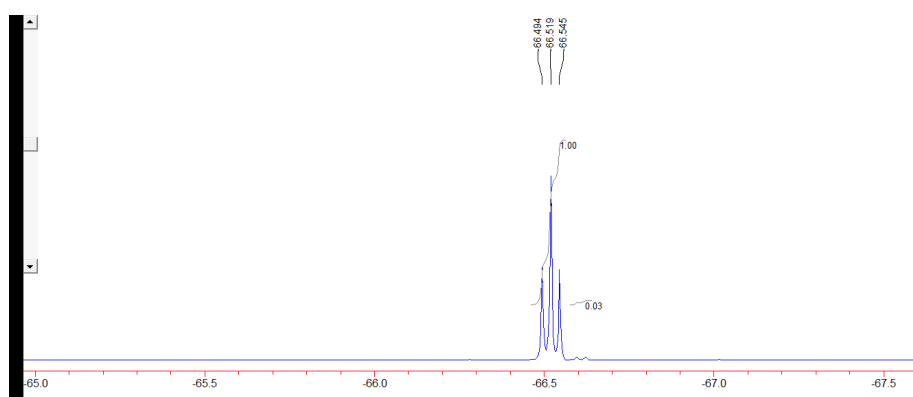

## Competitive reaction between alkyne 2a and alkene 4

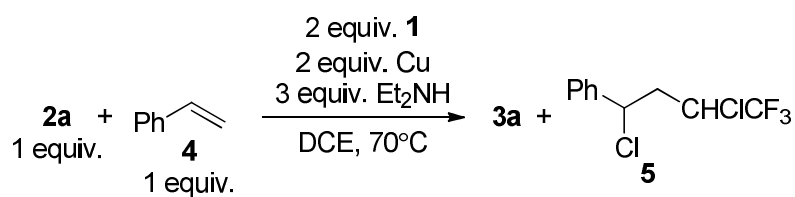

| entry | condition       | yield (%) |    |
|-------|-----------------|-----------|----|
|       |                 | 3a        | 5  |
| 1     | only 4 for 8h   | 0         | 24 |
| 2     | 2a and 4 for 5h | 57        | 7  |
| 3     | 2a and 4 for 9h | 63        | 9  |

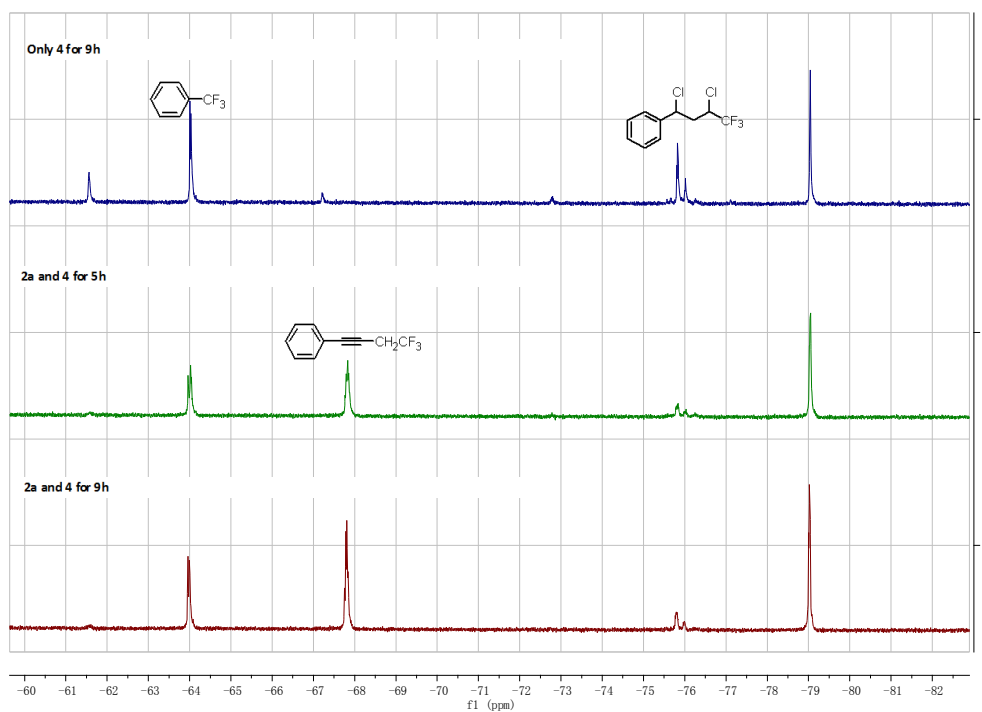

## Spectroscopic data for products

3a

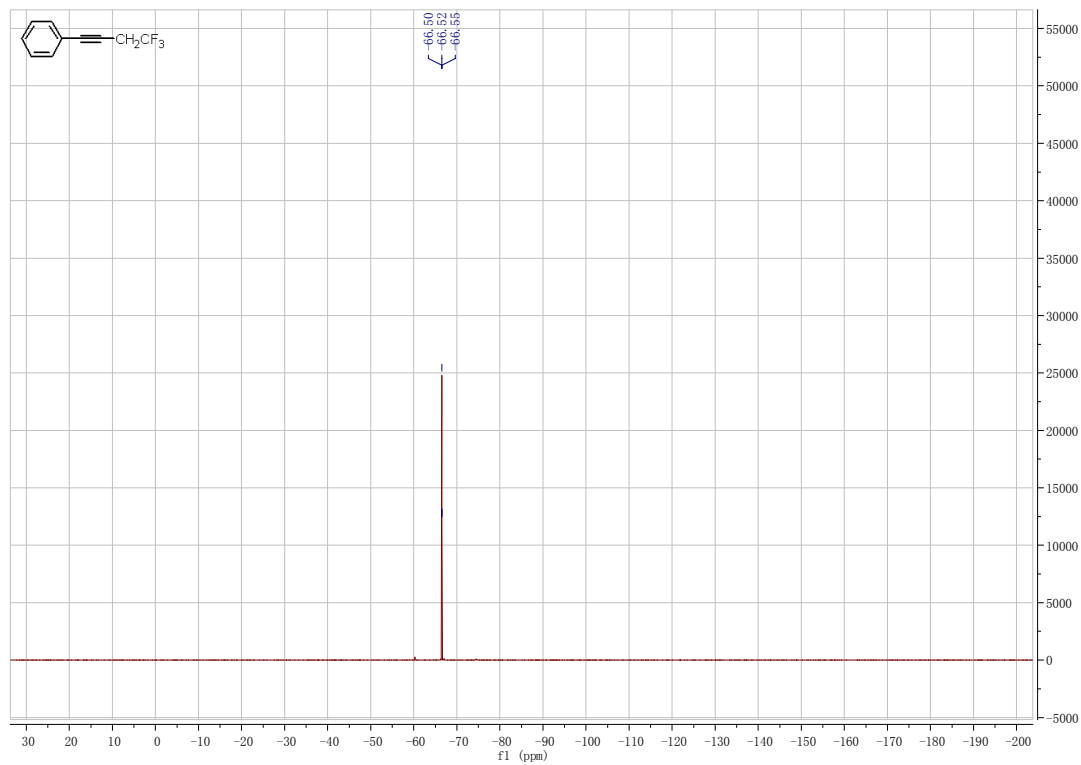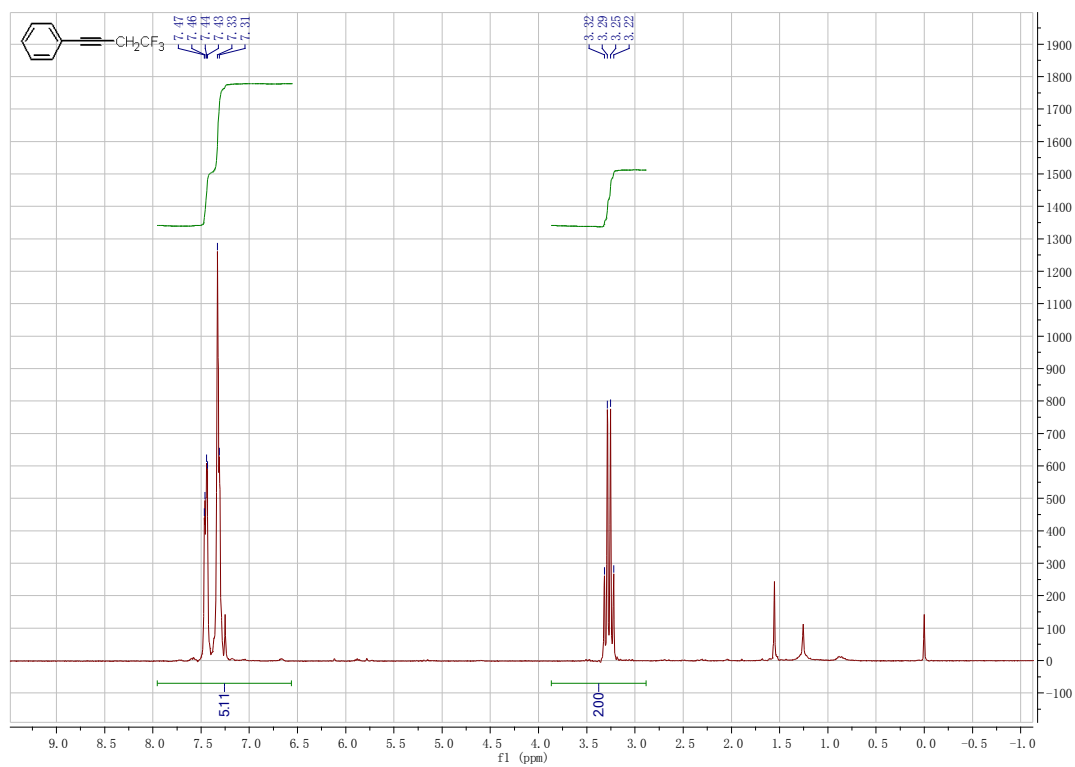

3b

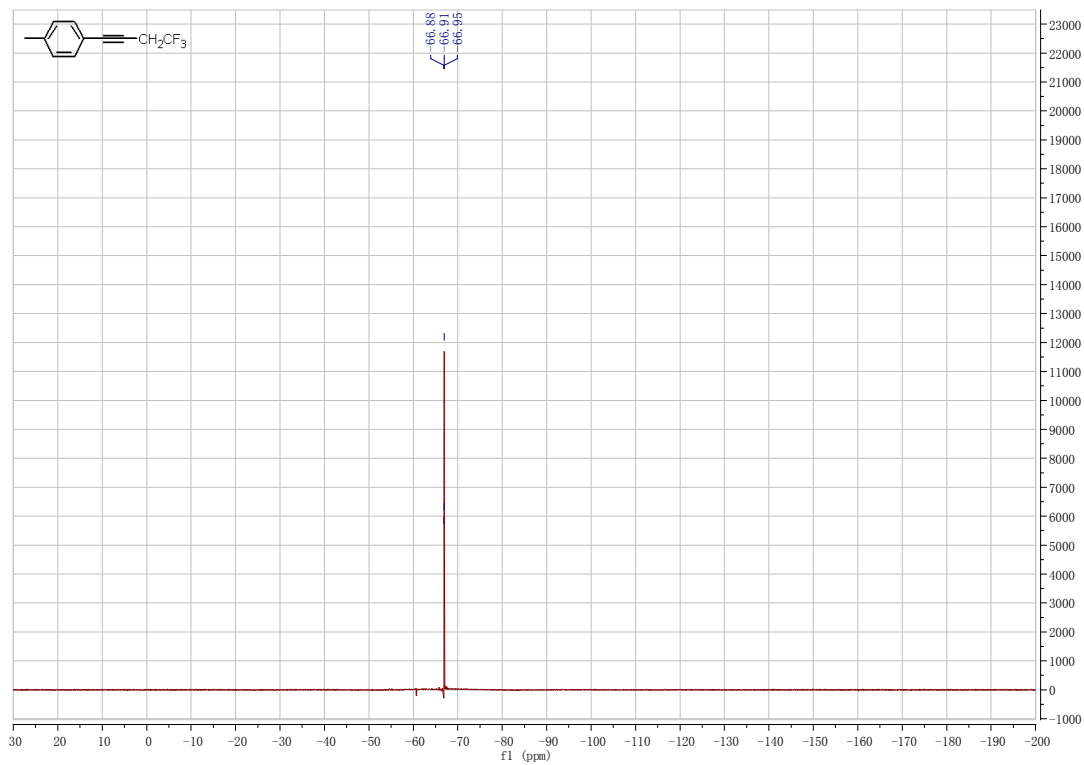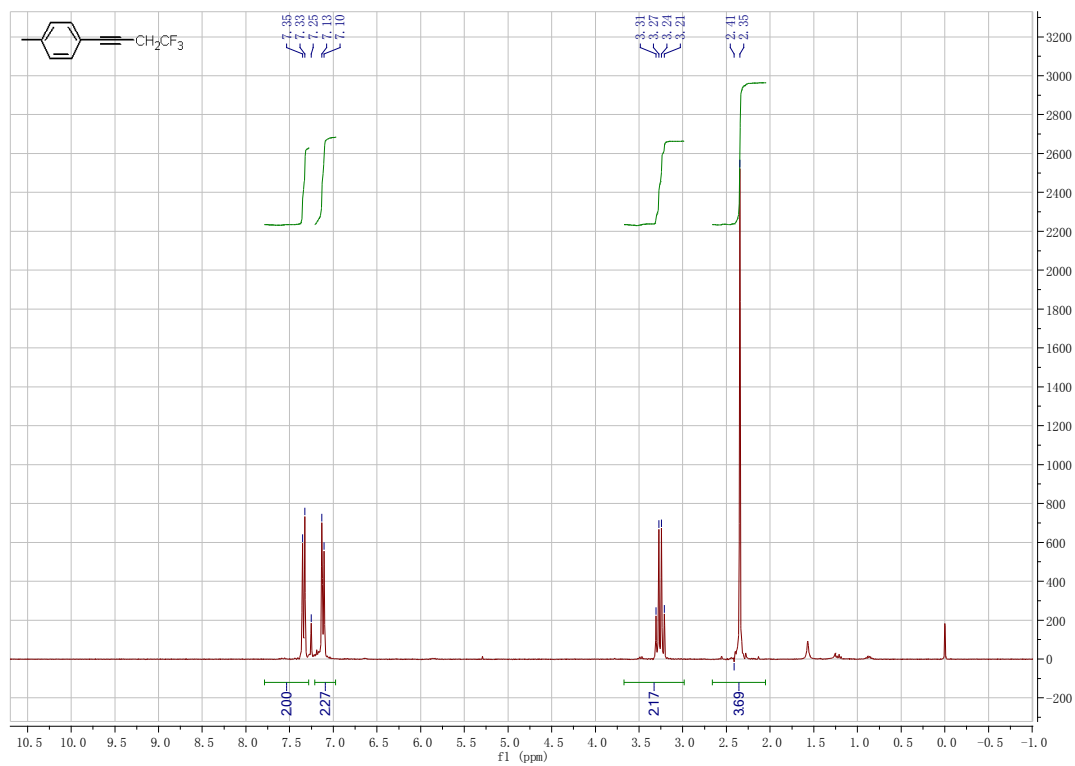



3c

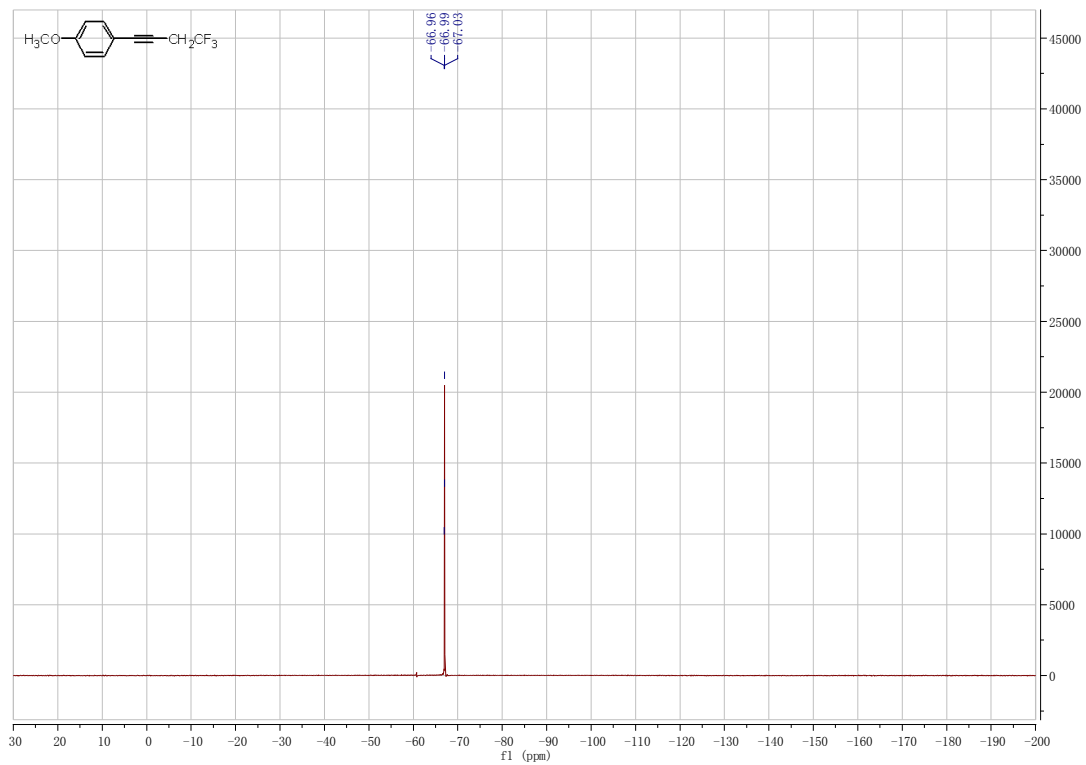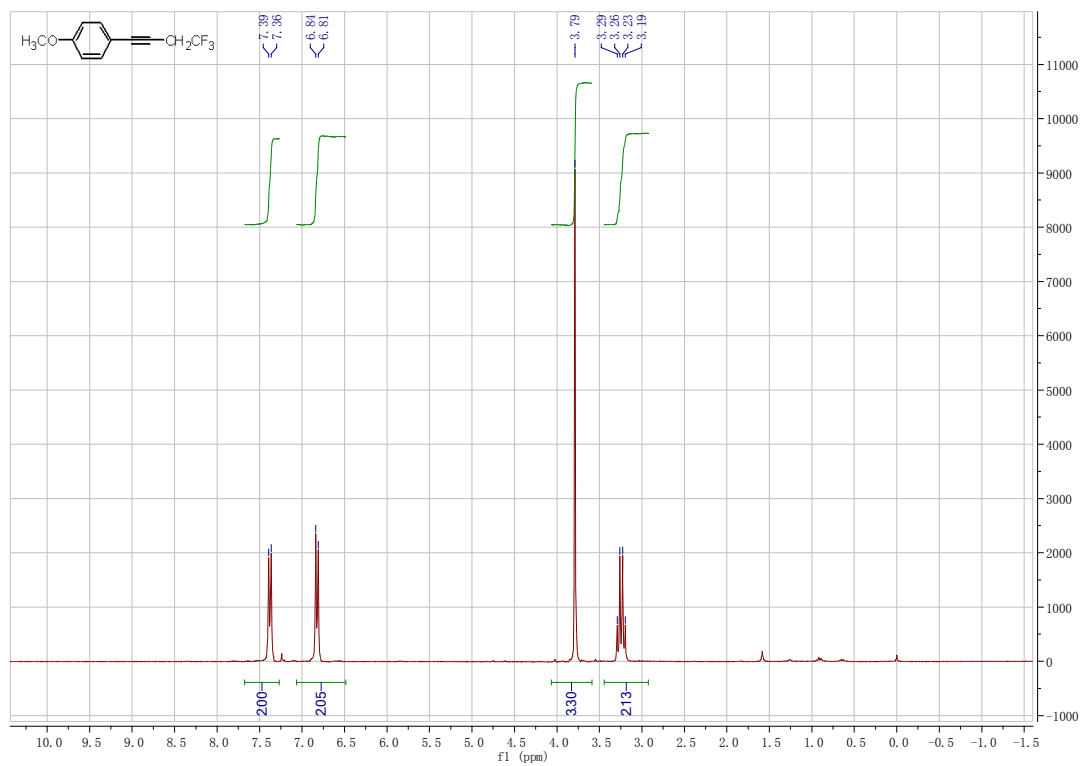

3d

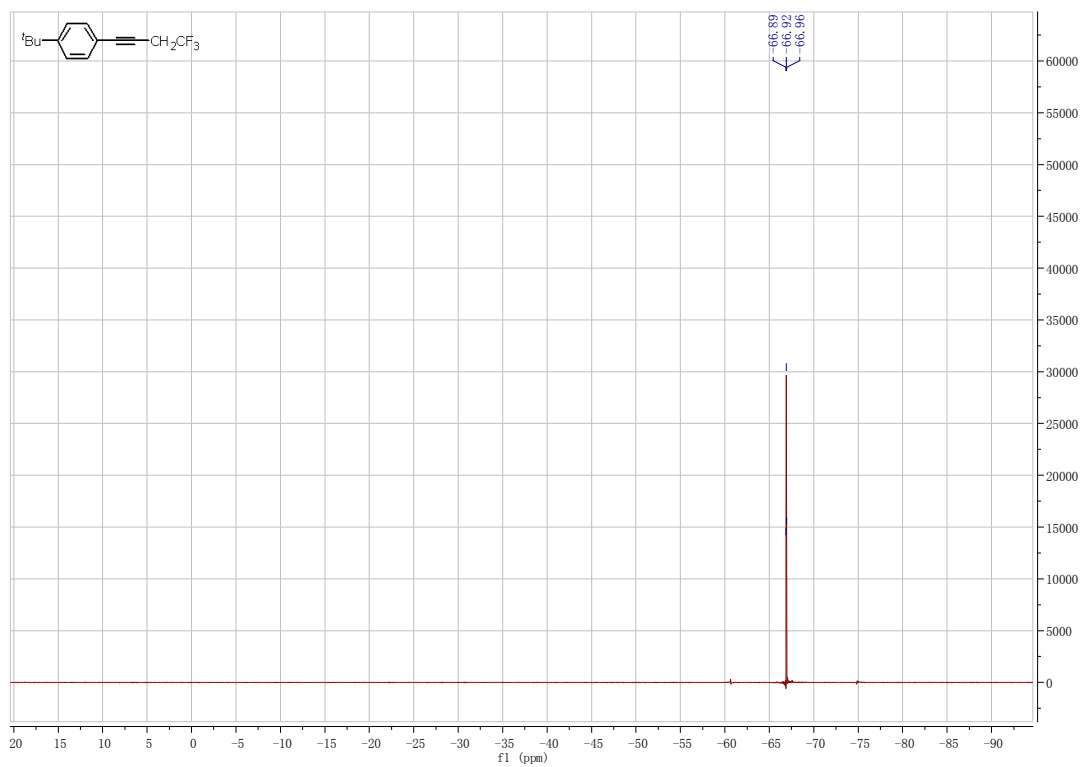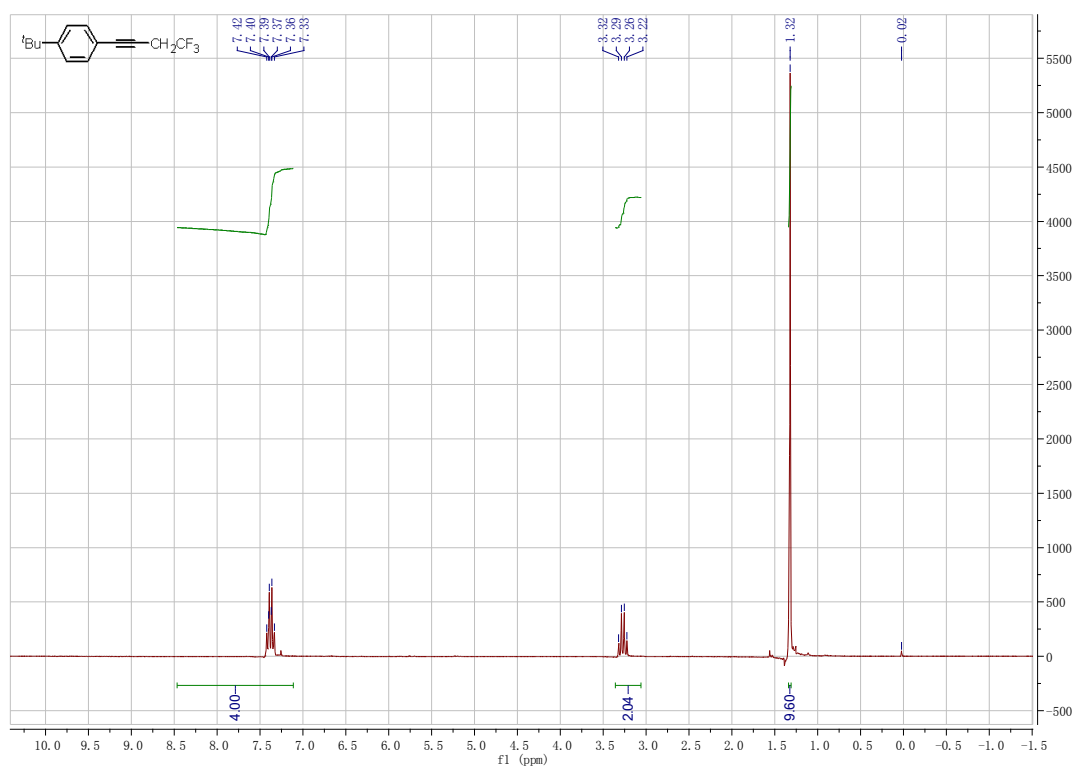

3e

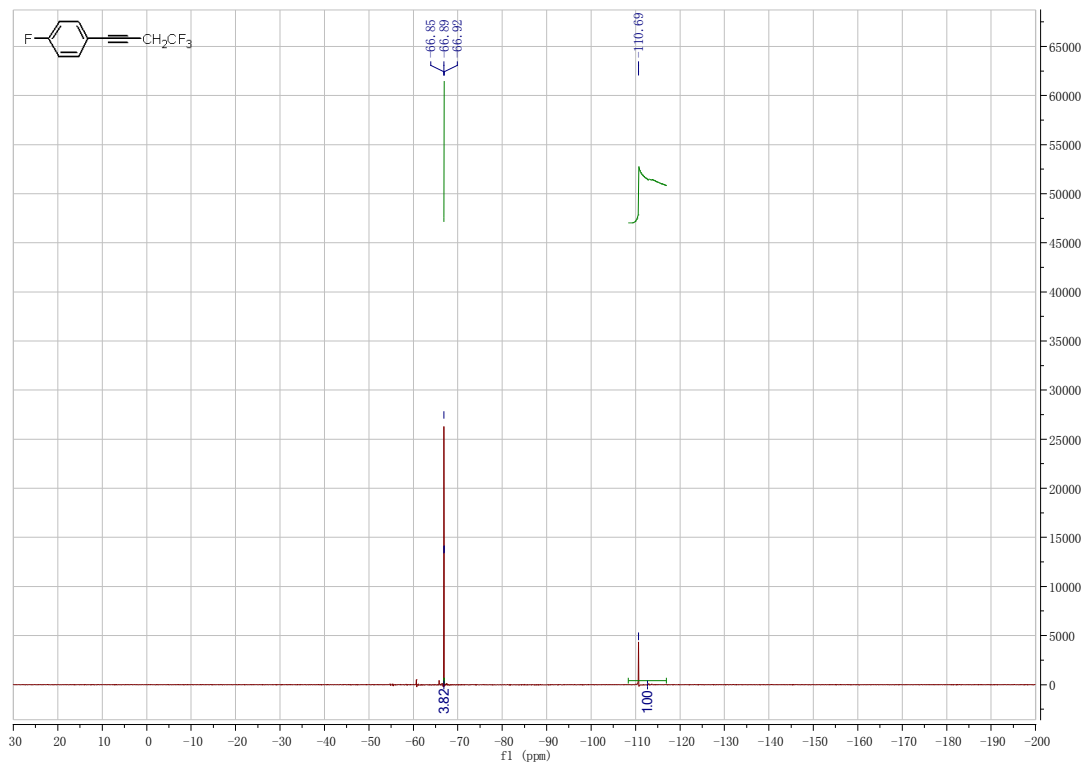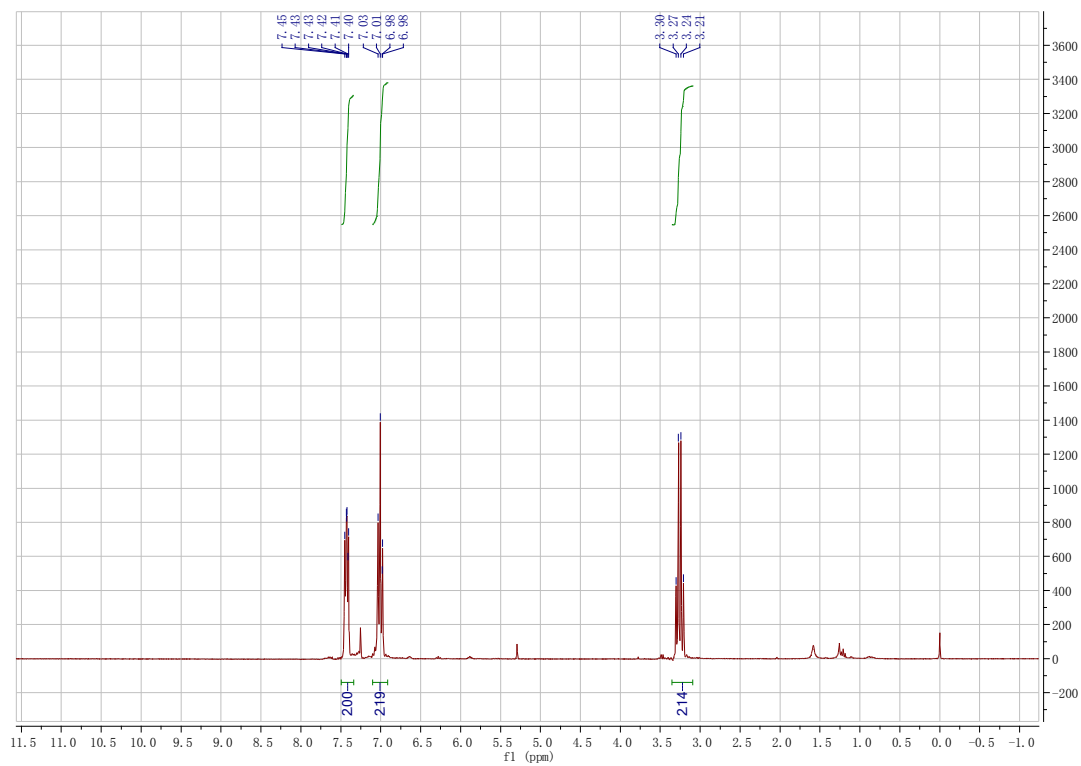

3f

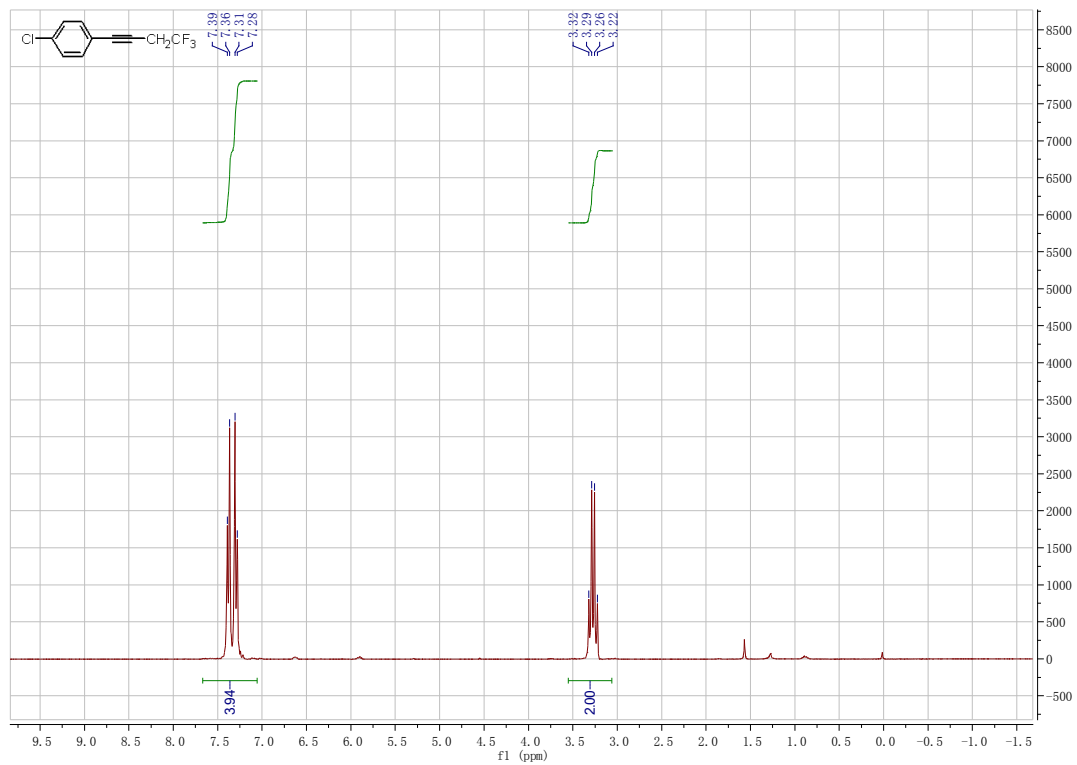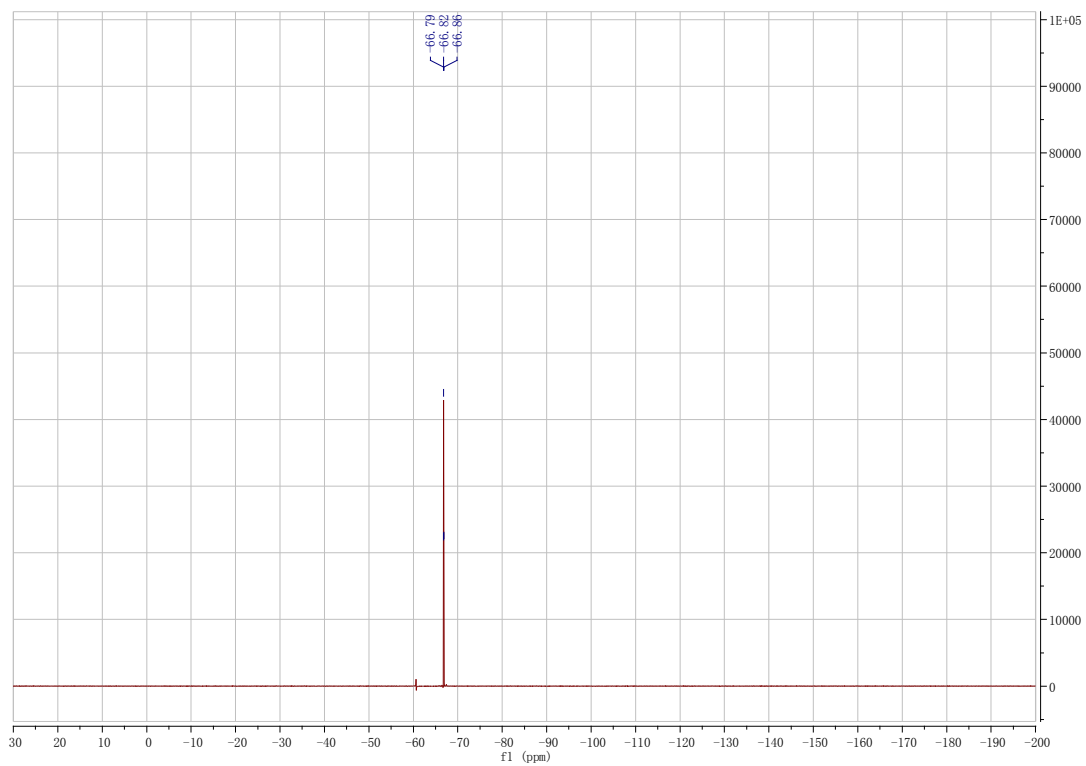

3g

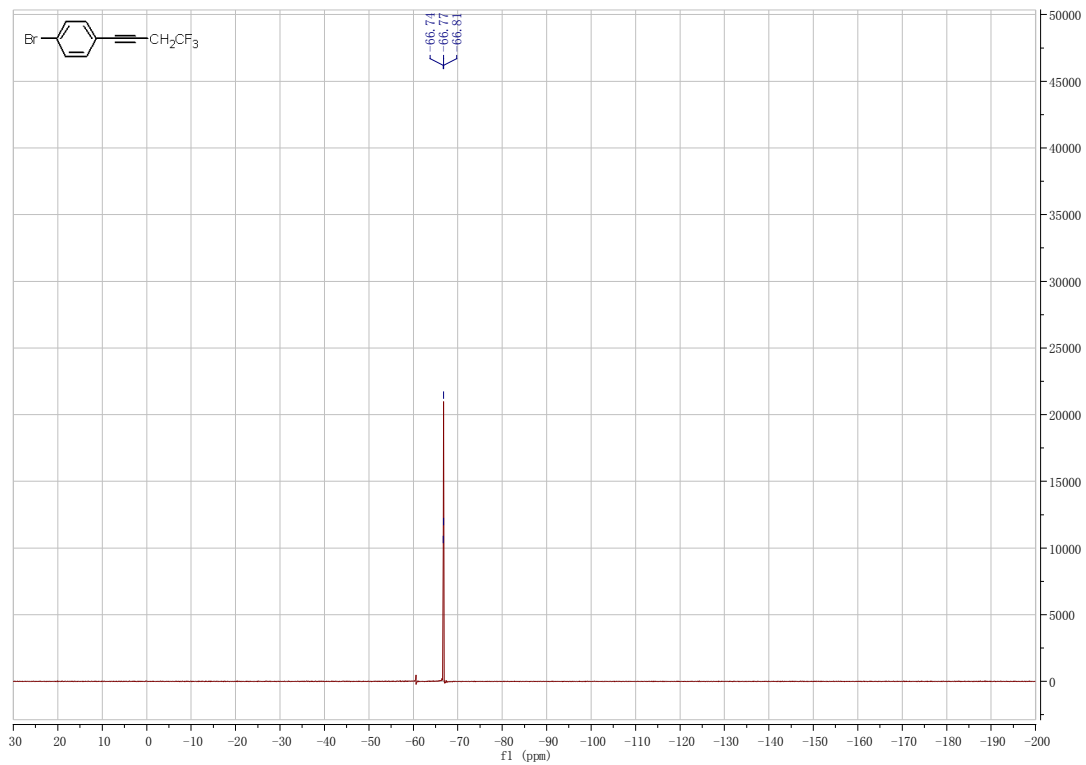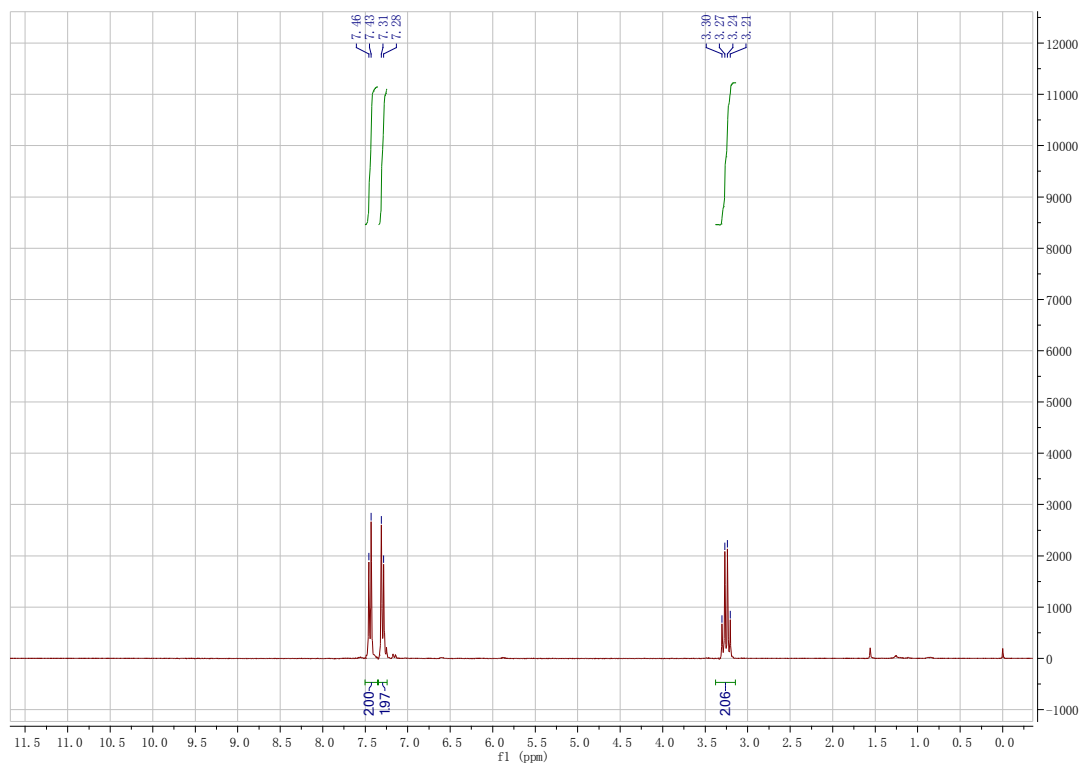

3h

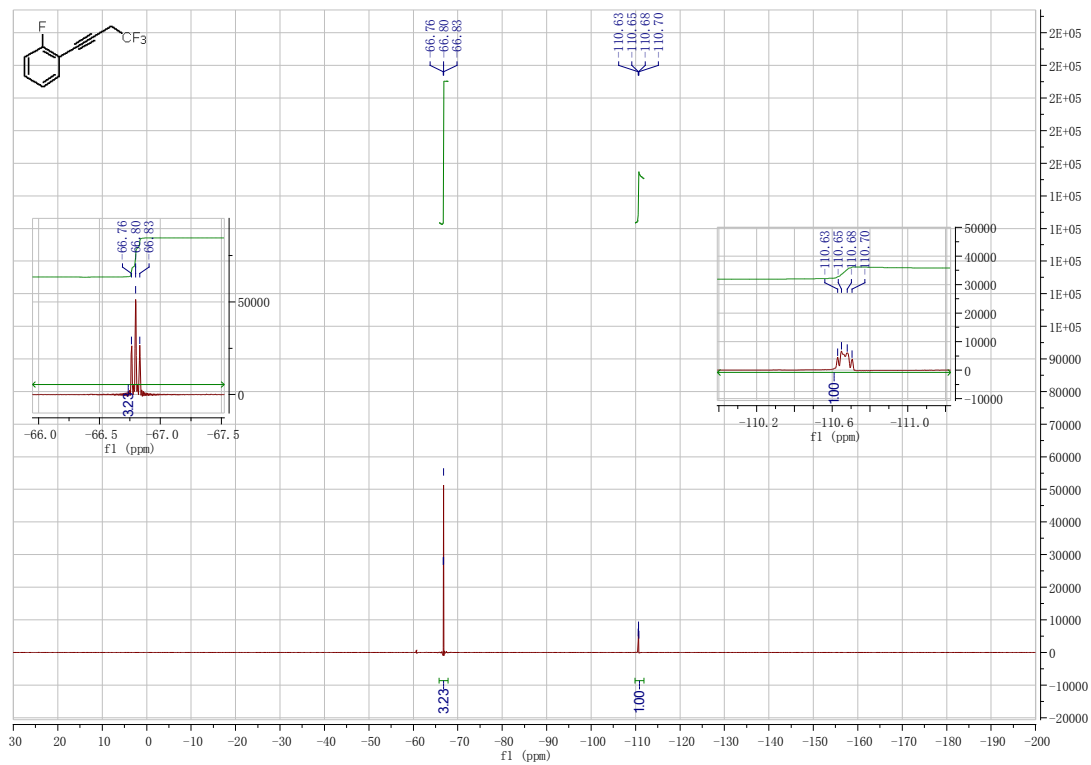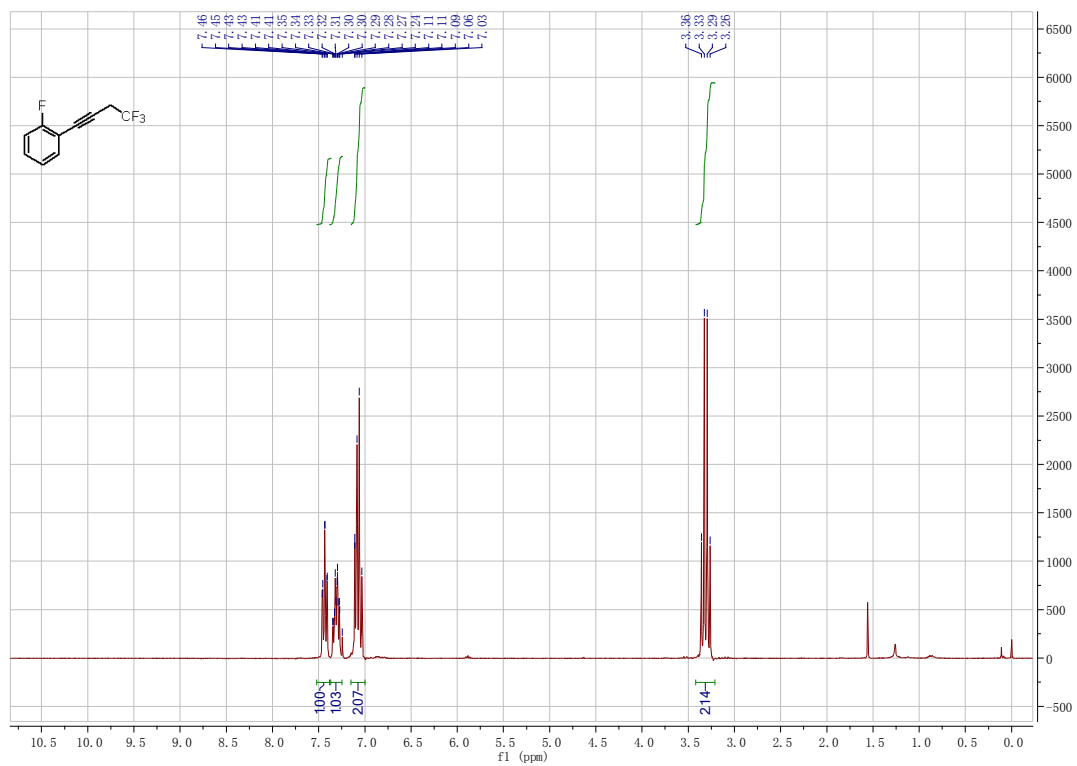

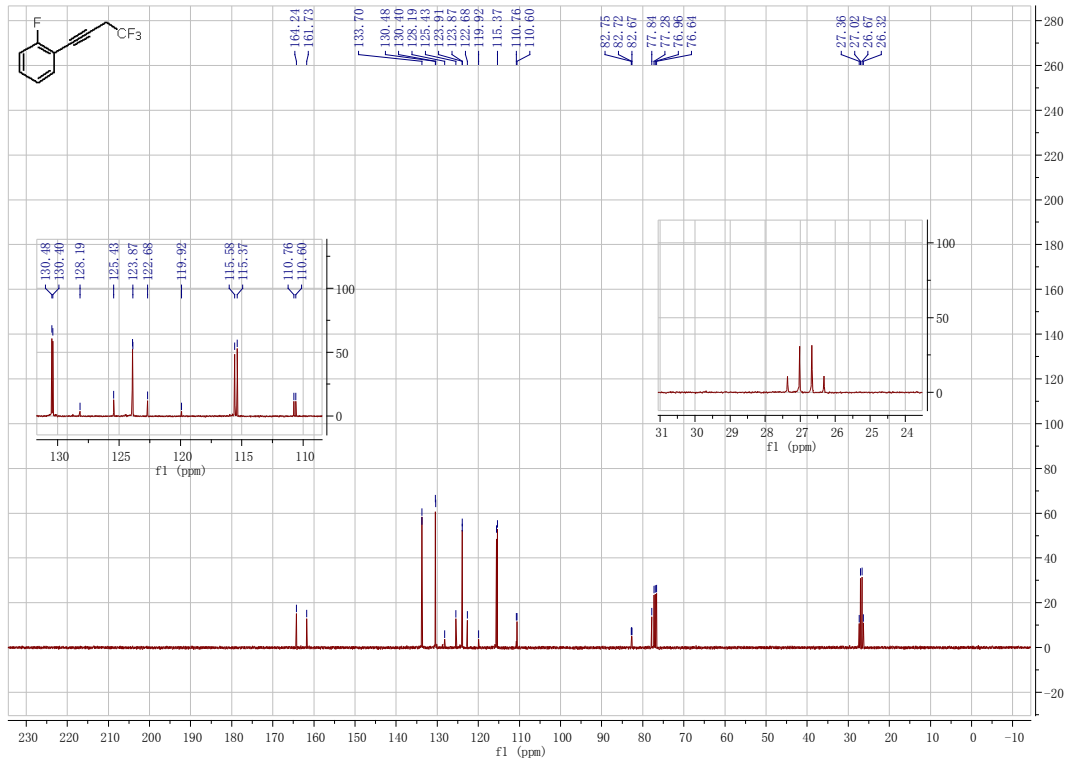

3i

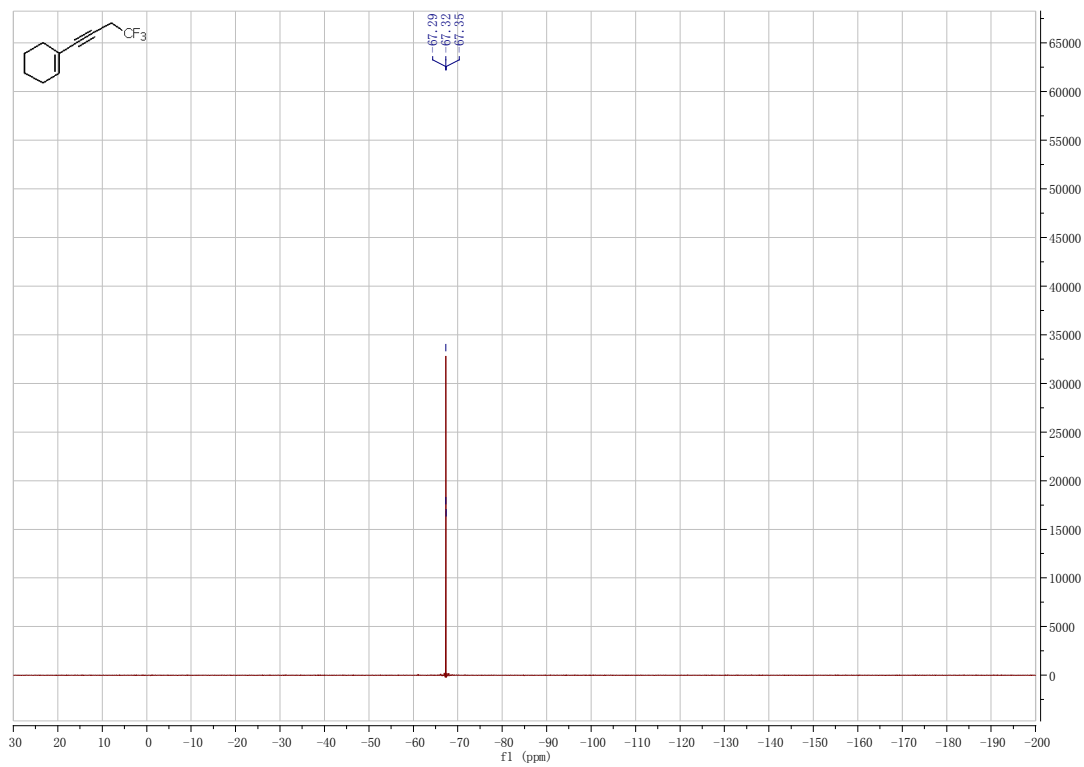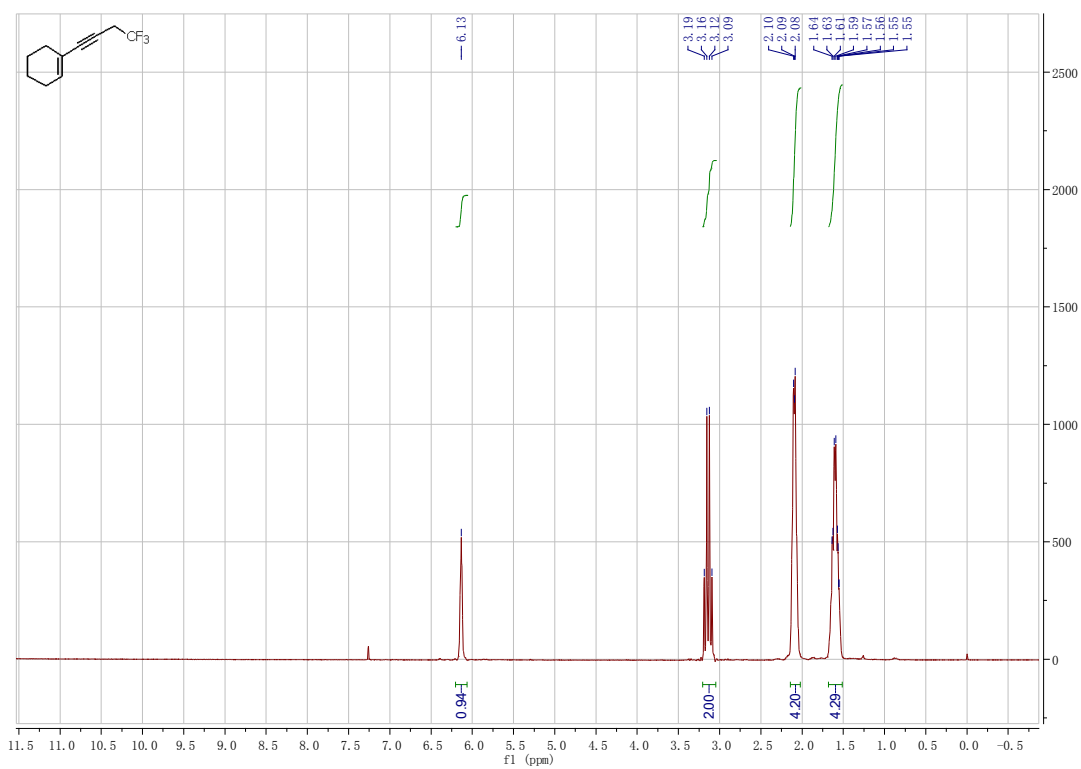



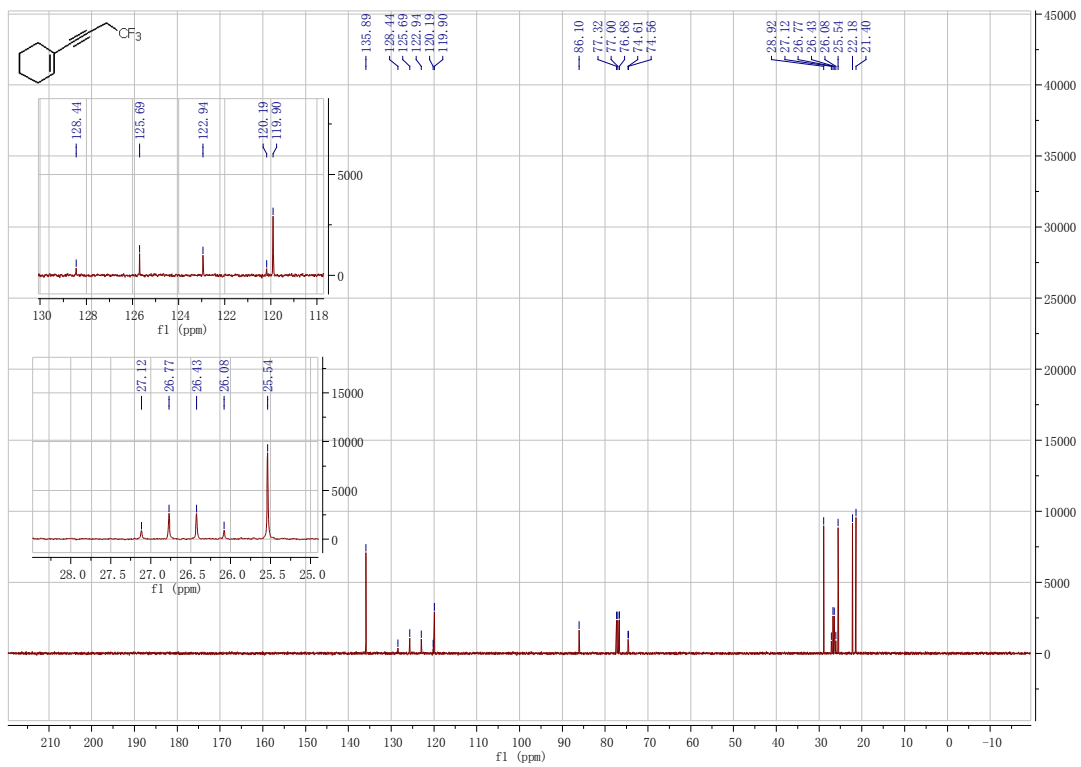

3j

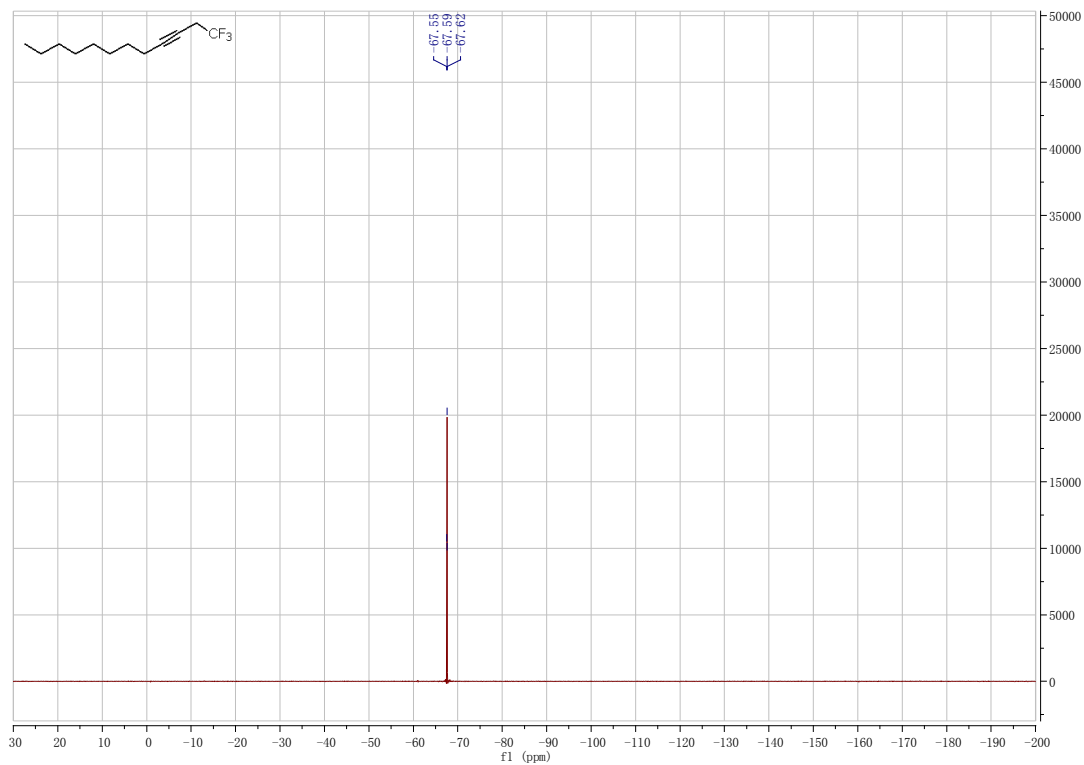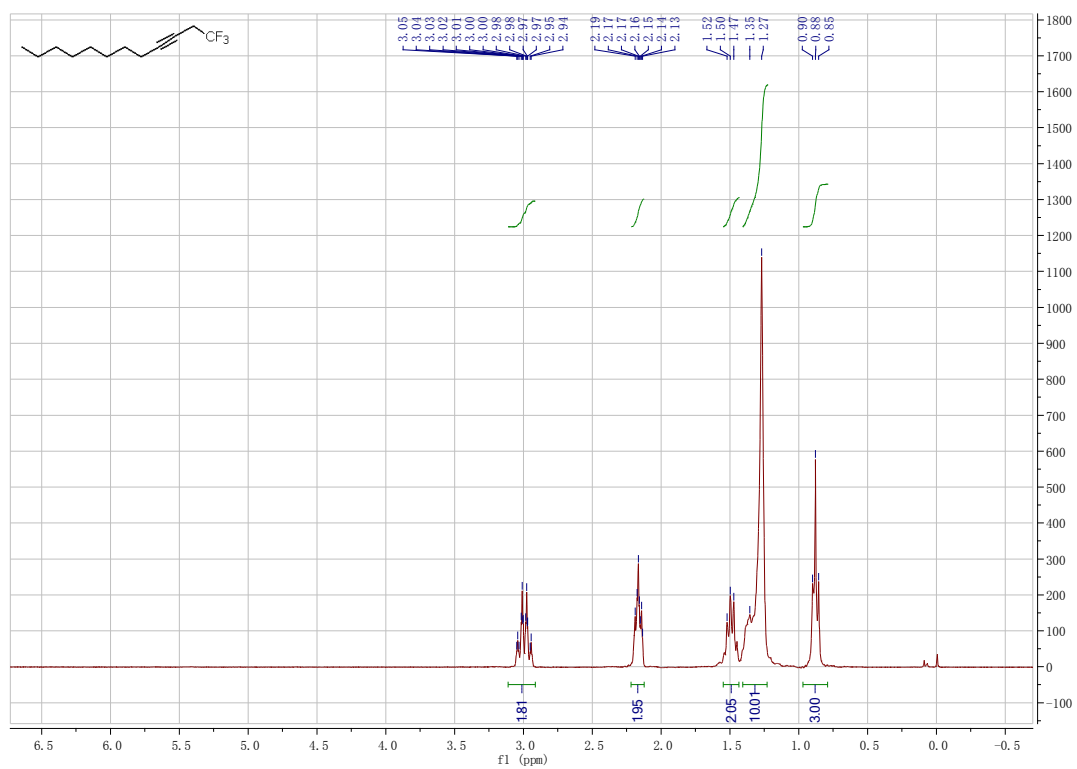

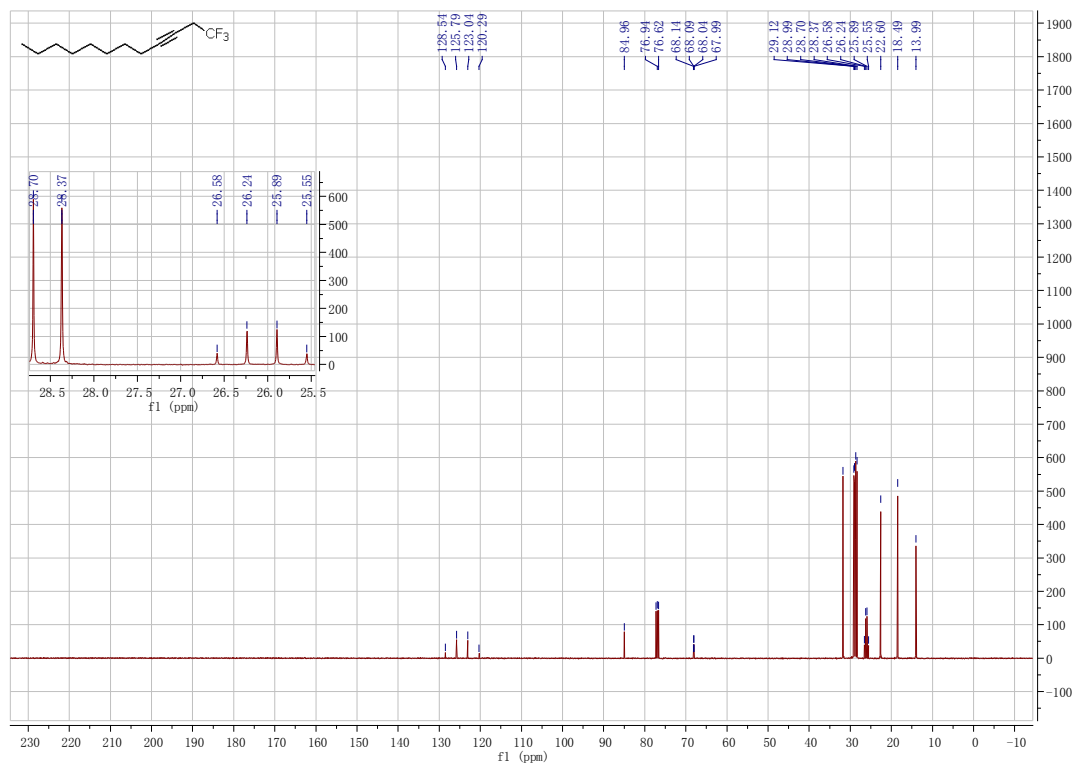

3k

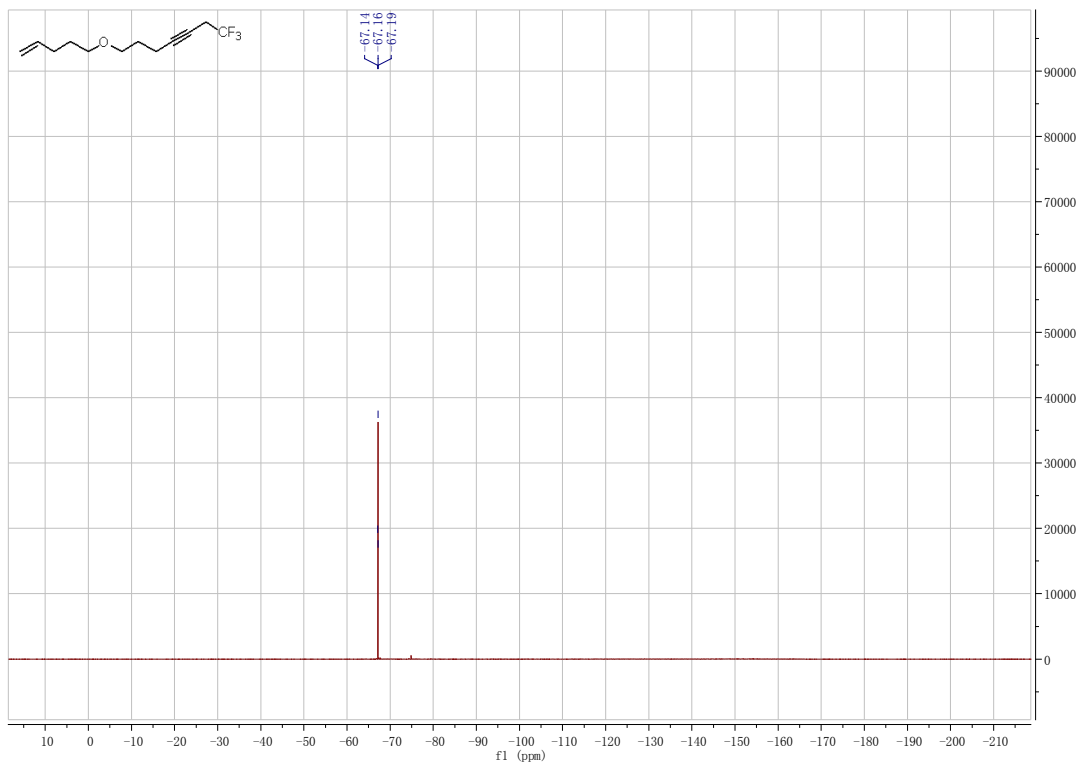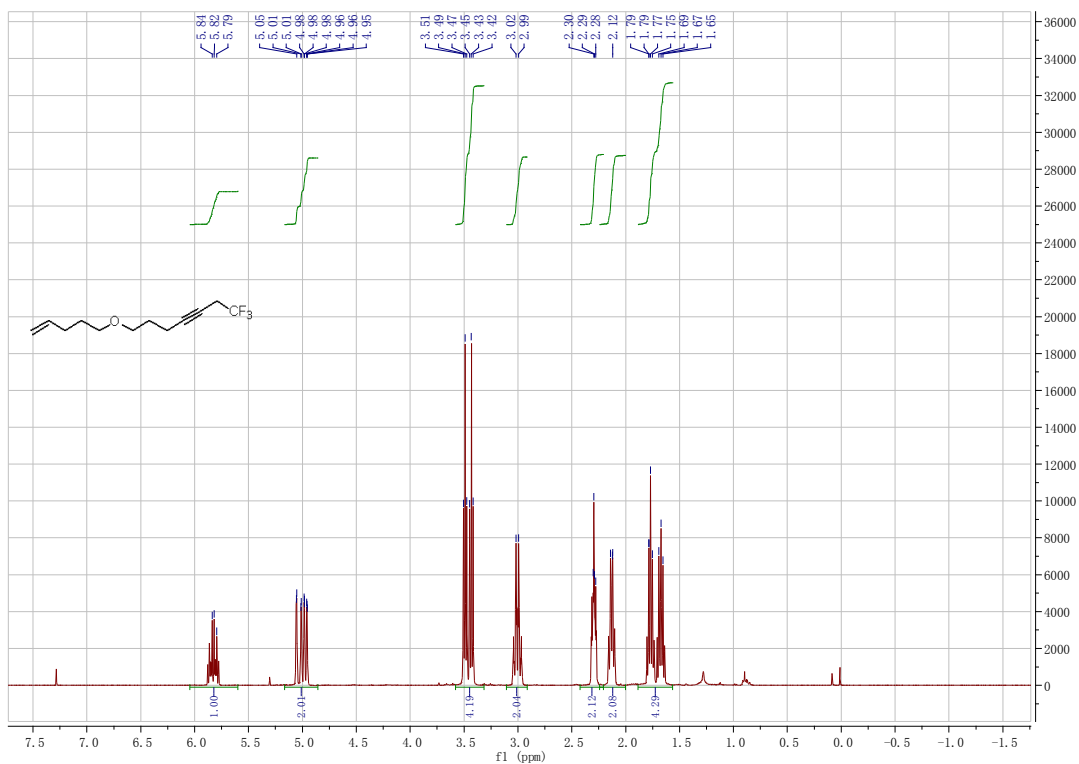

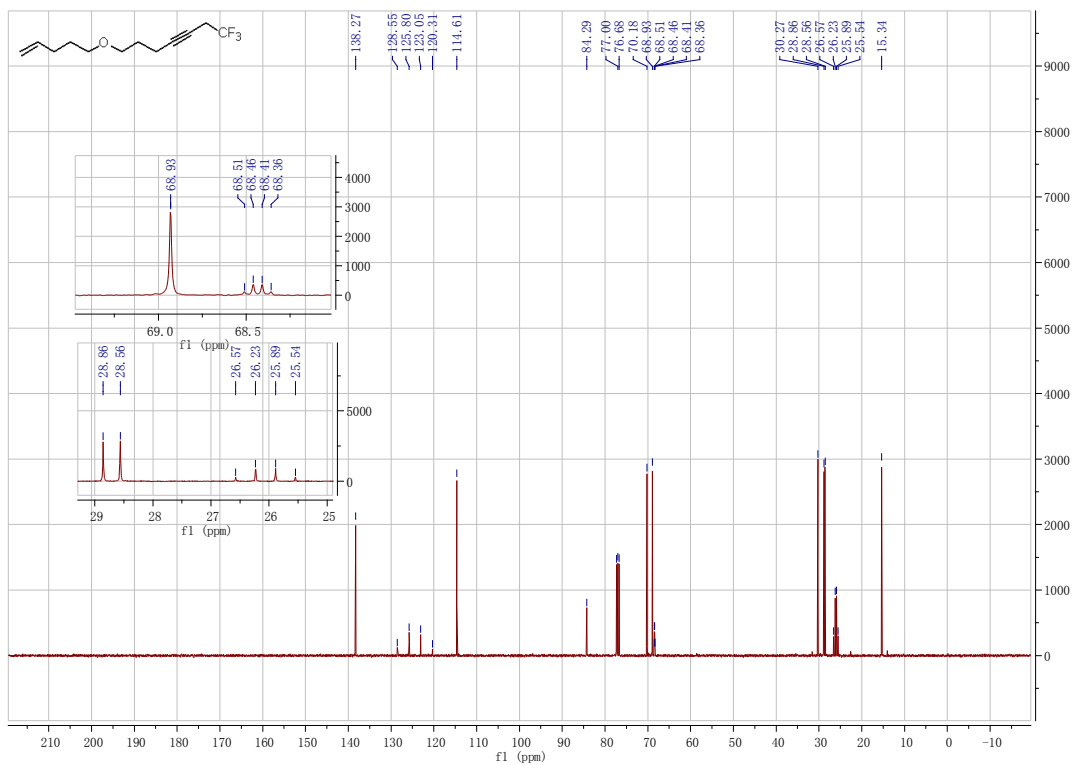

31

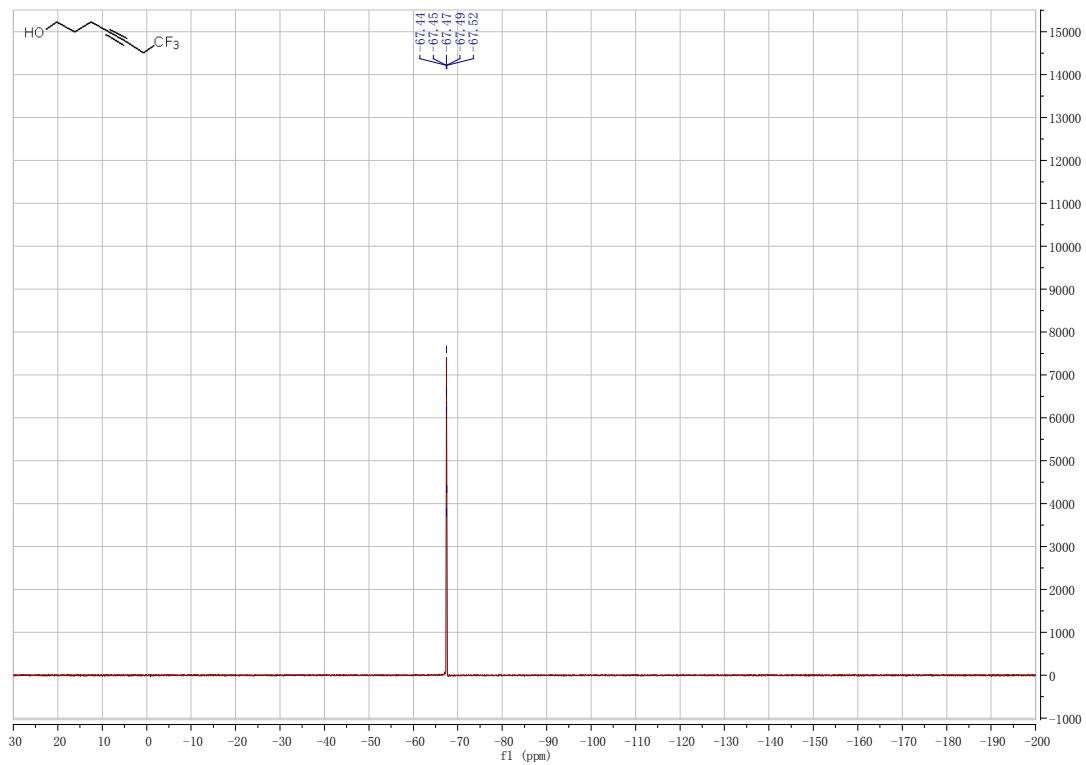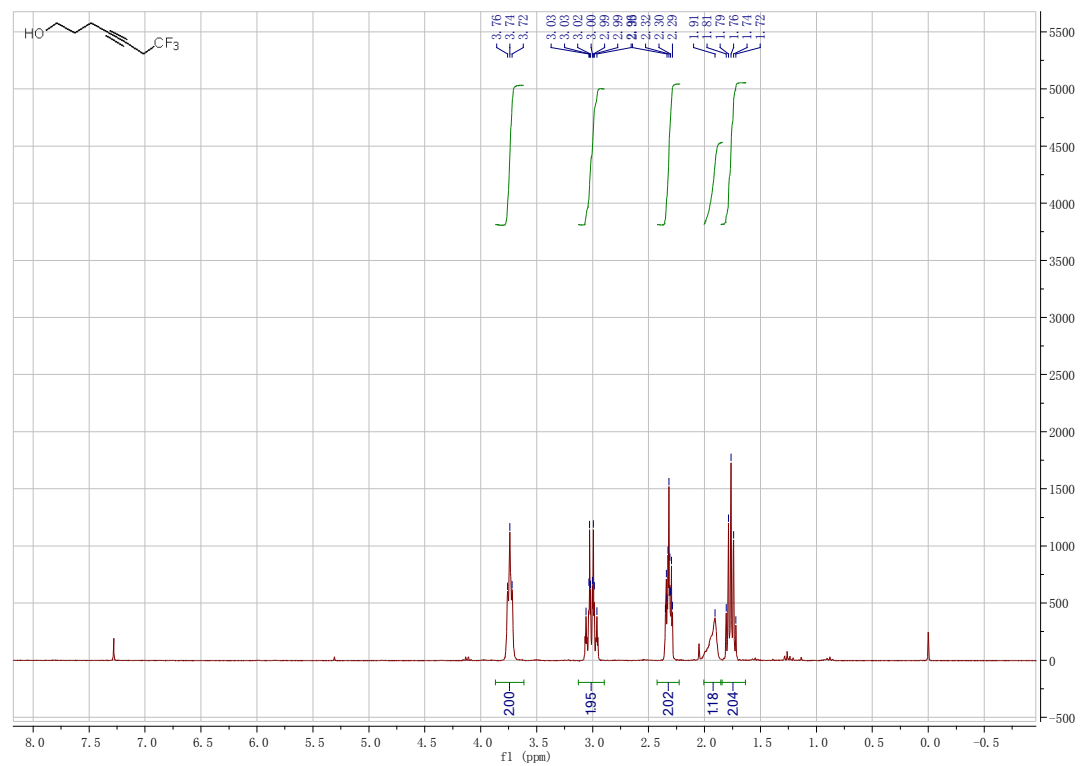

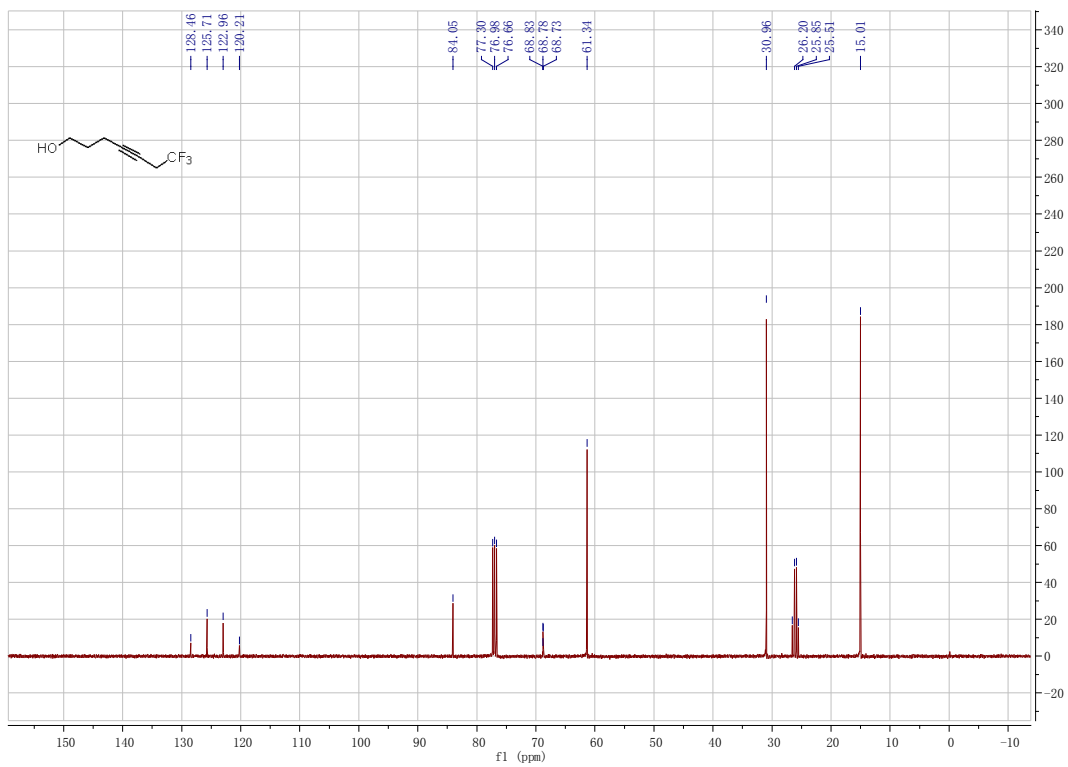

3m

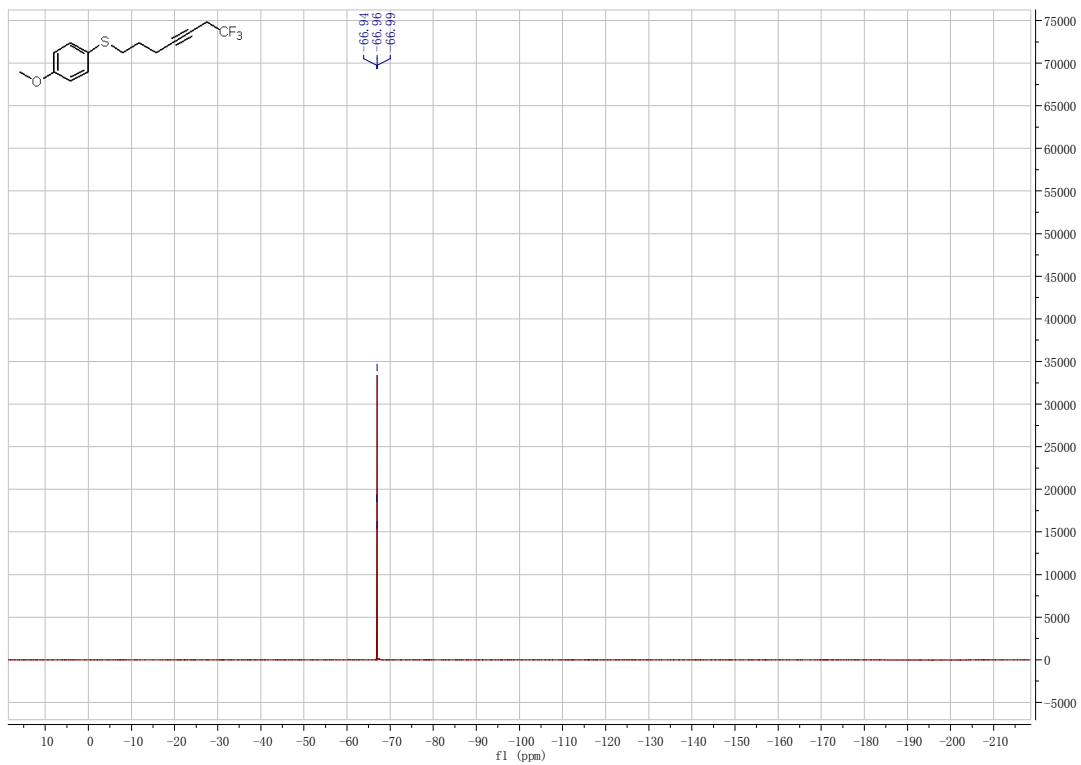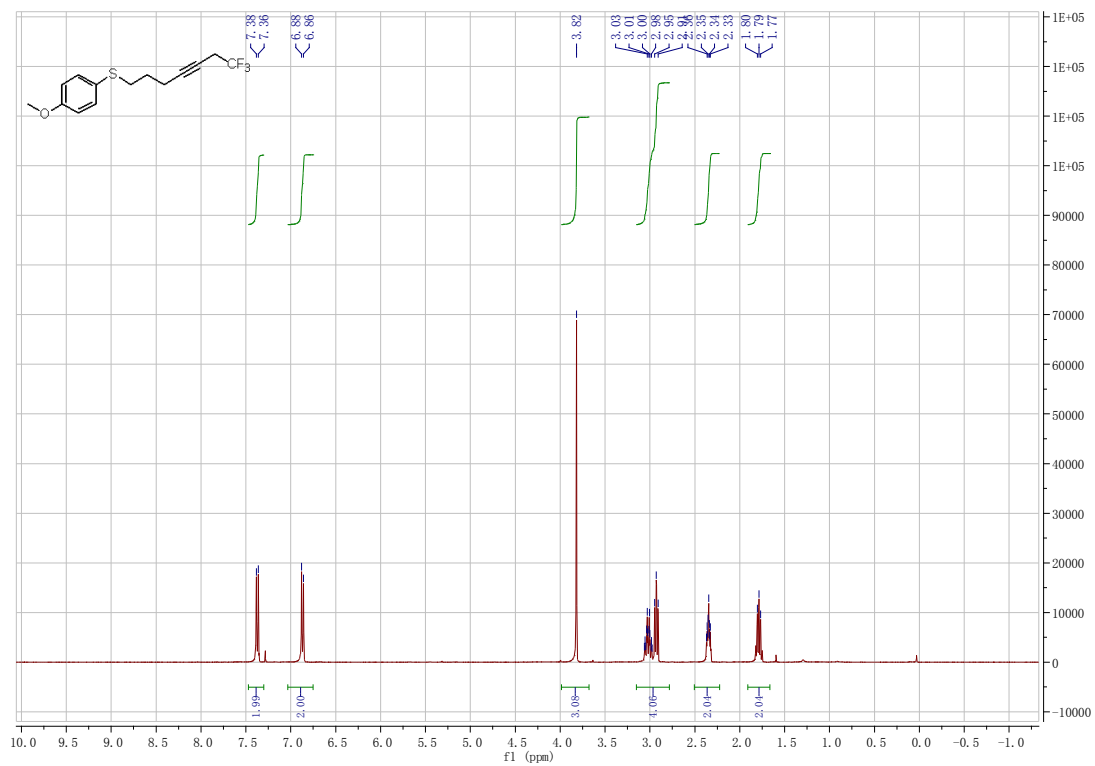



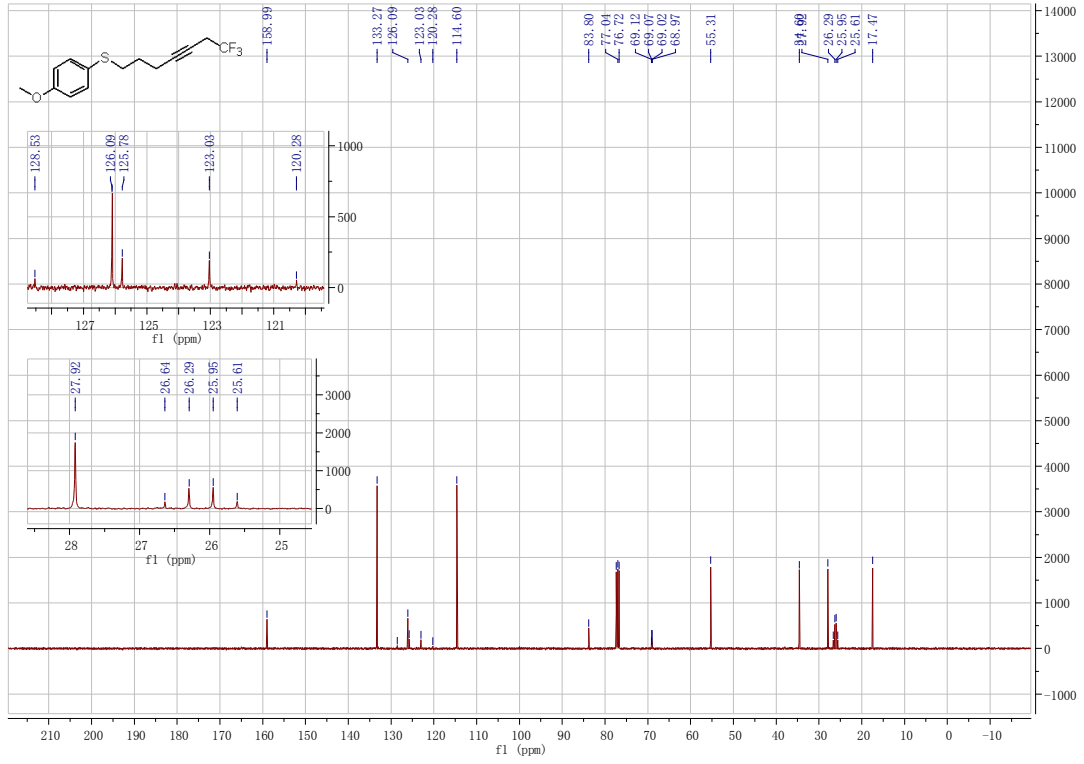

3n

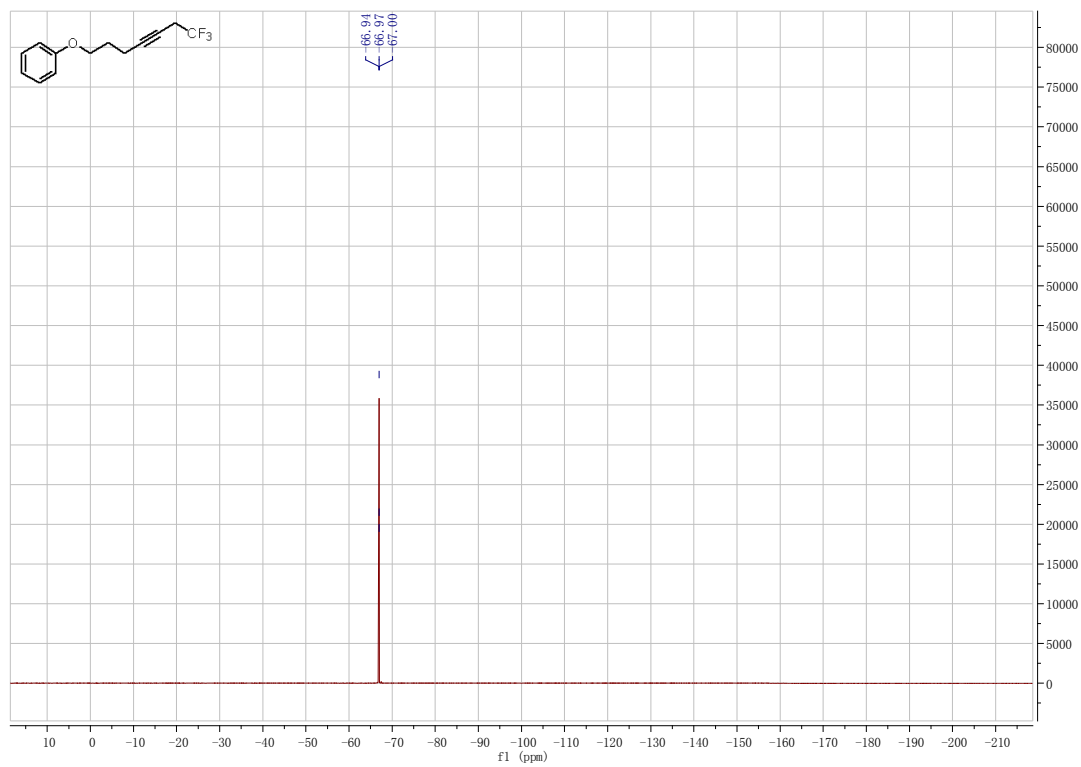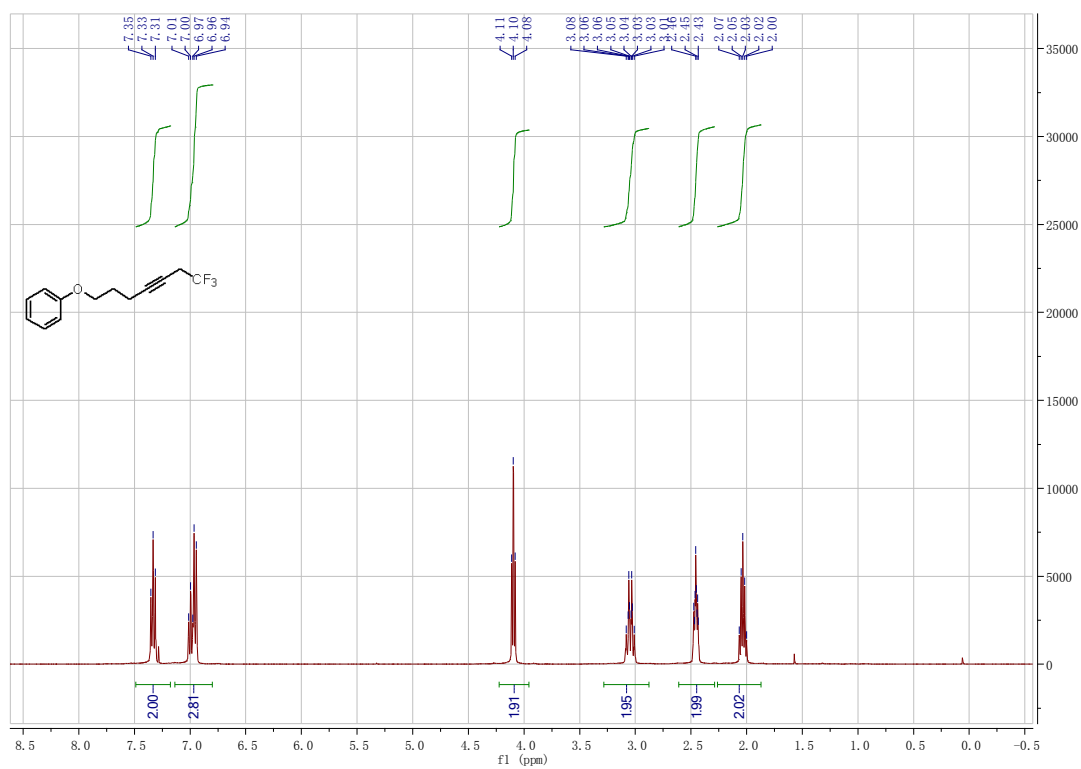

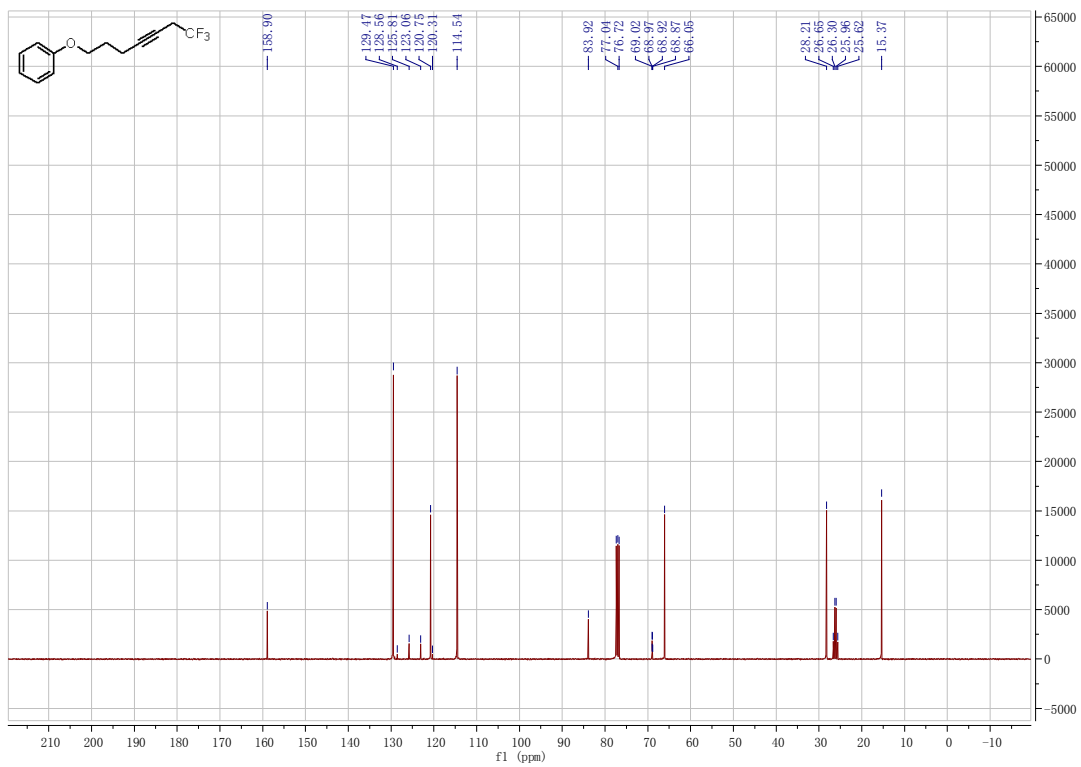

30

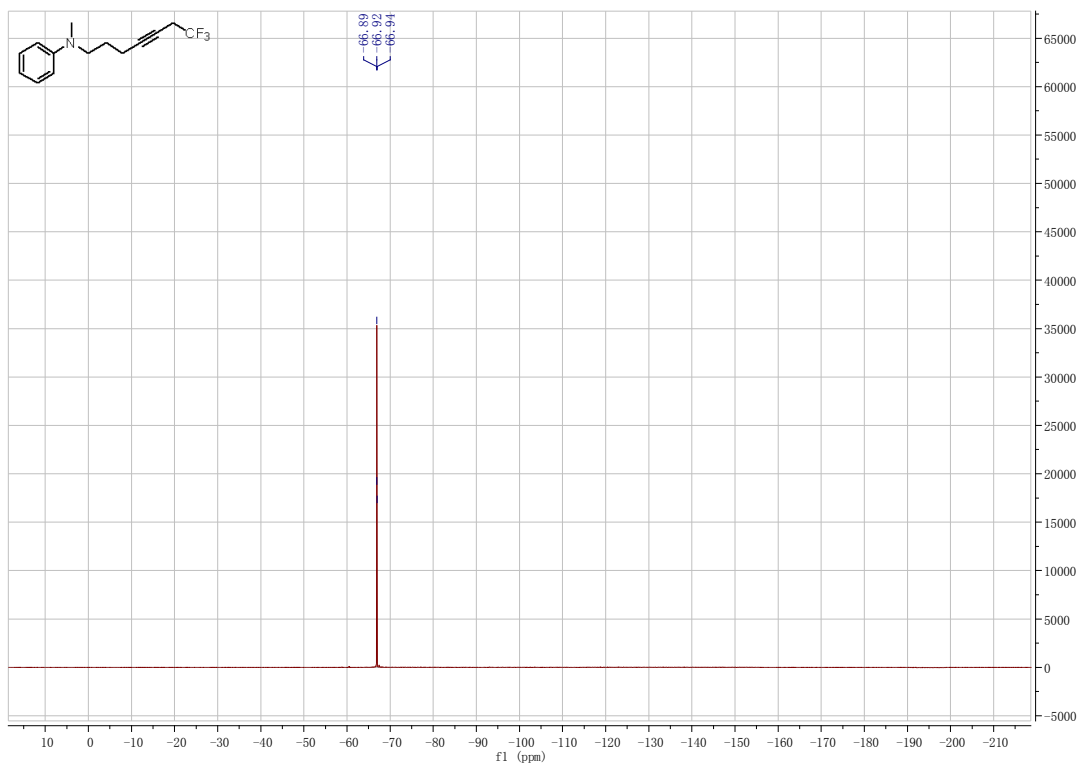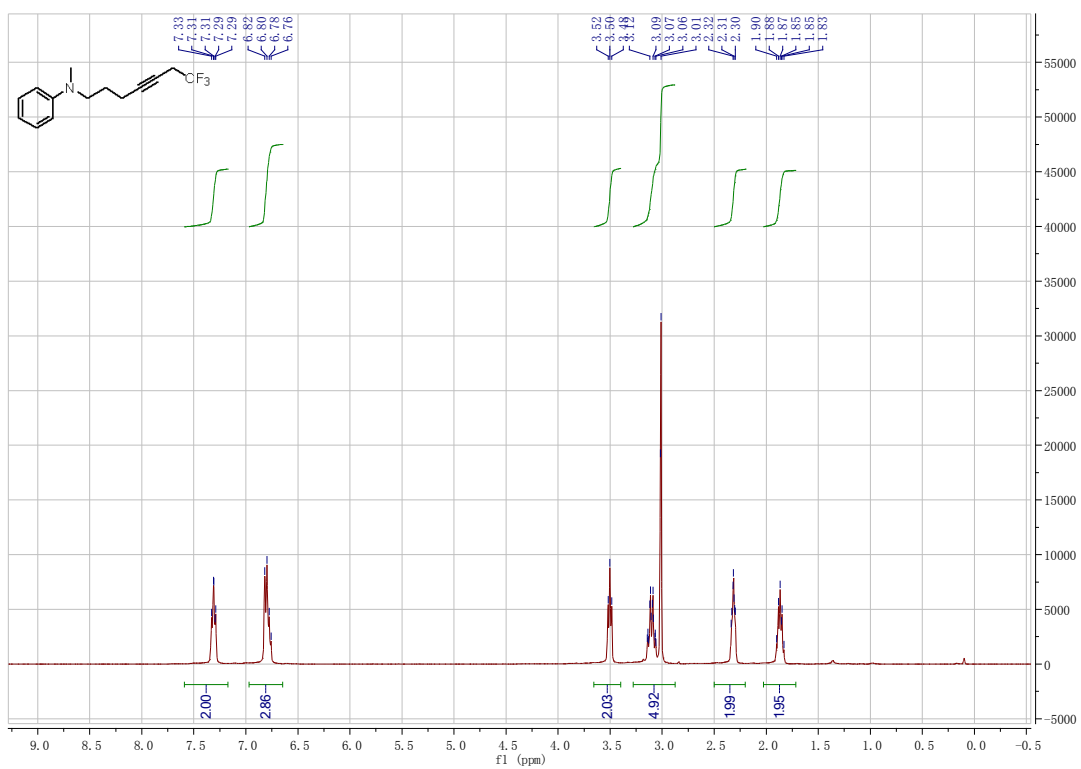



3p

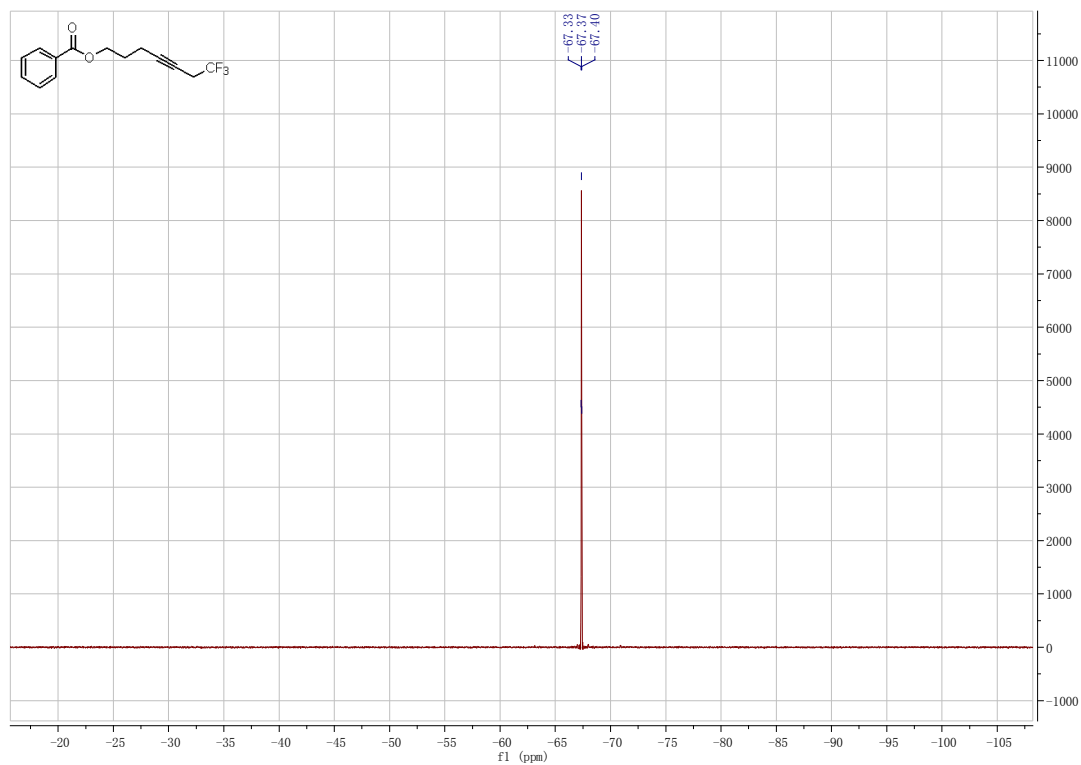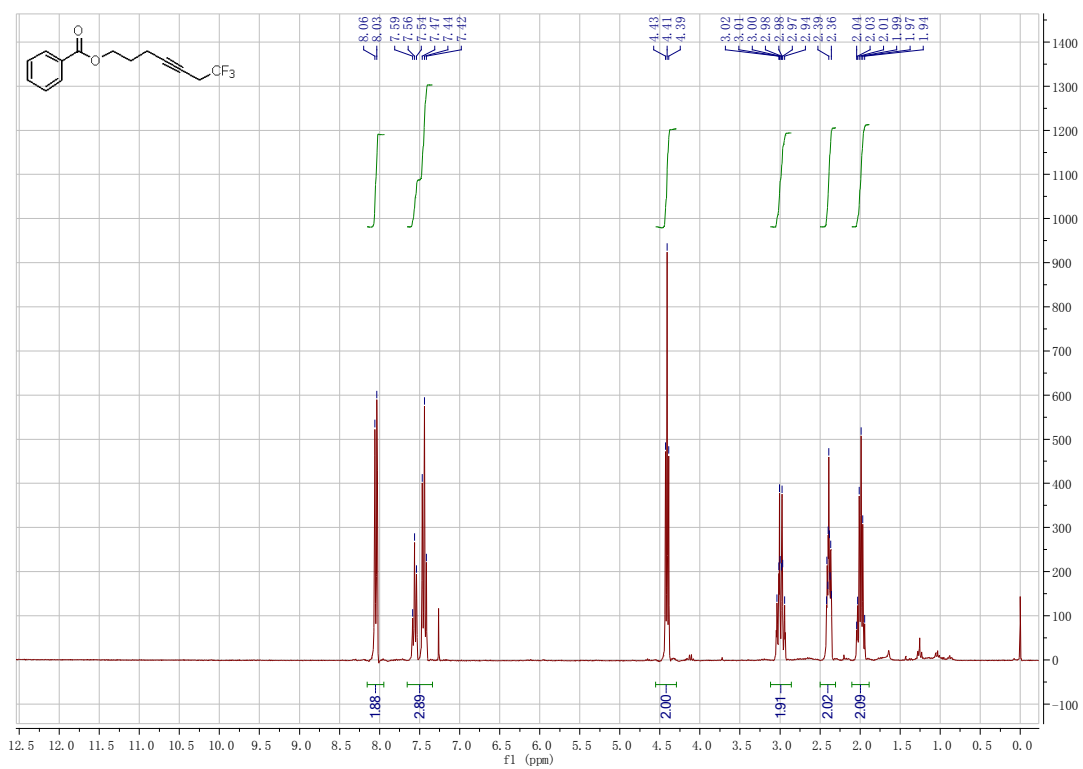

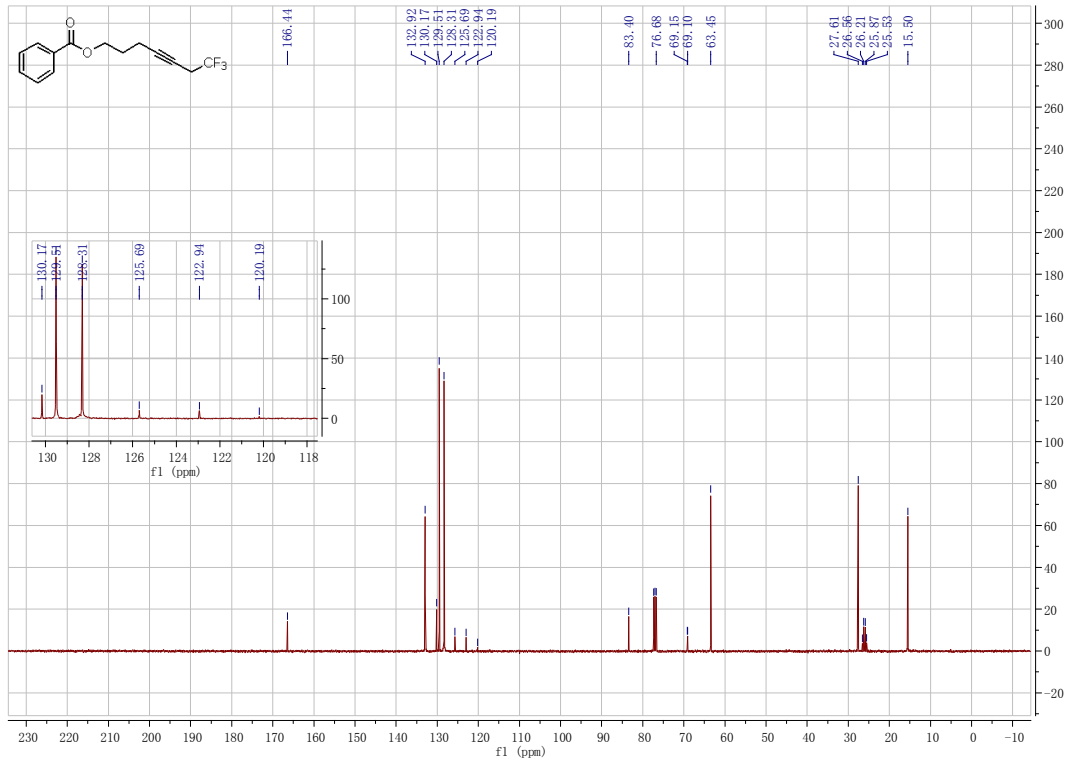

3q

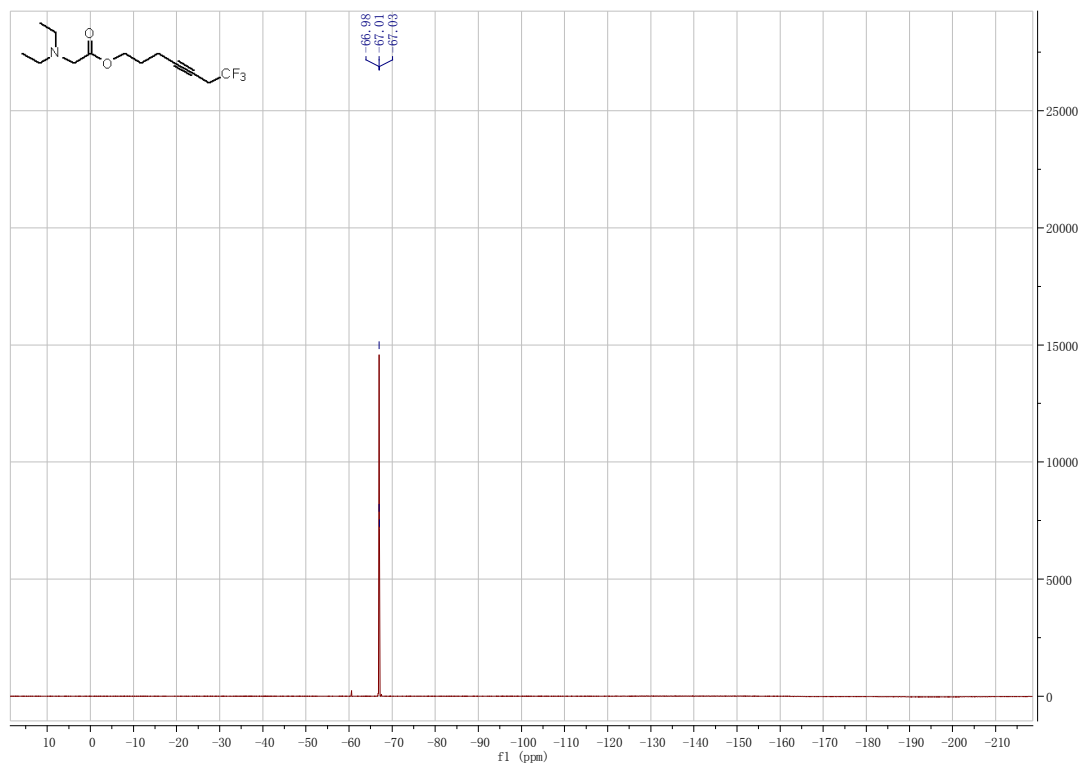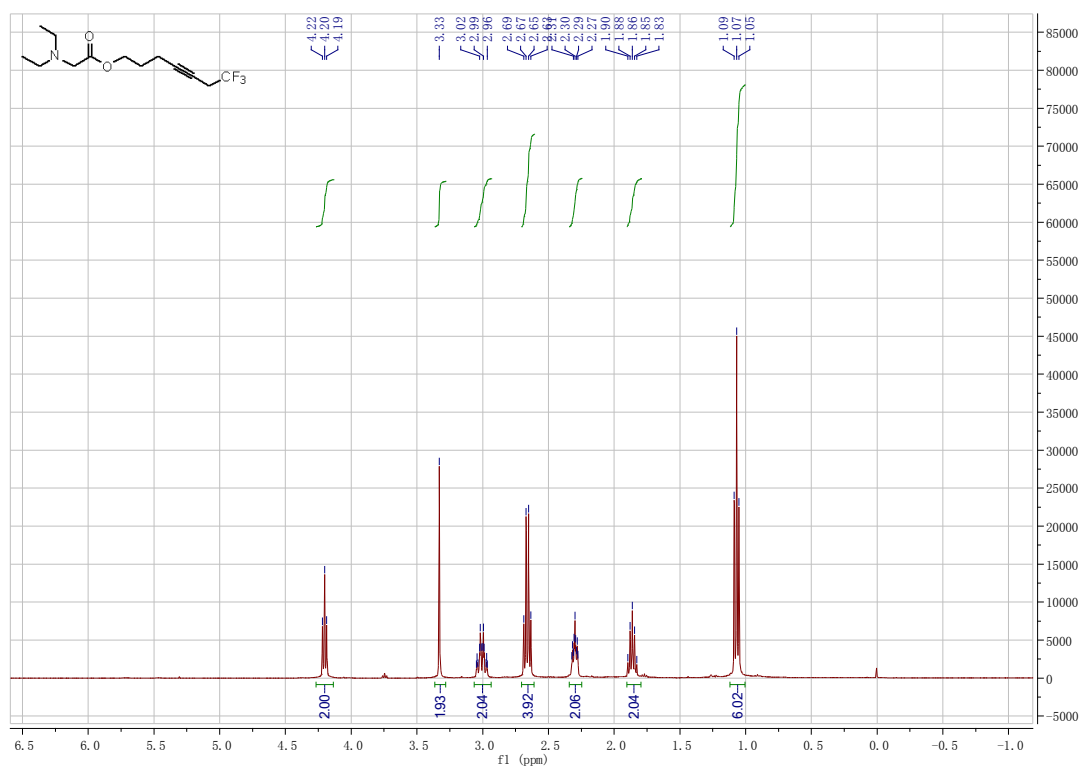



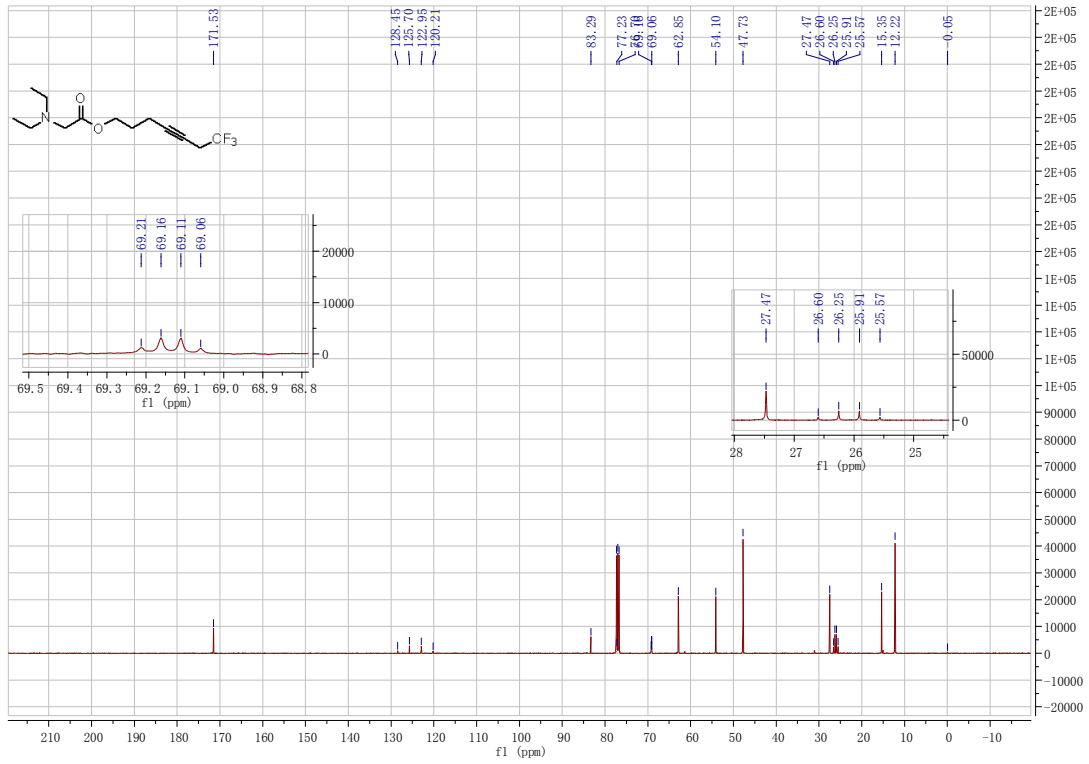

3r

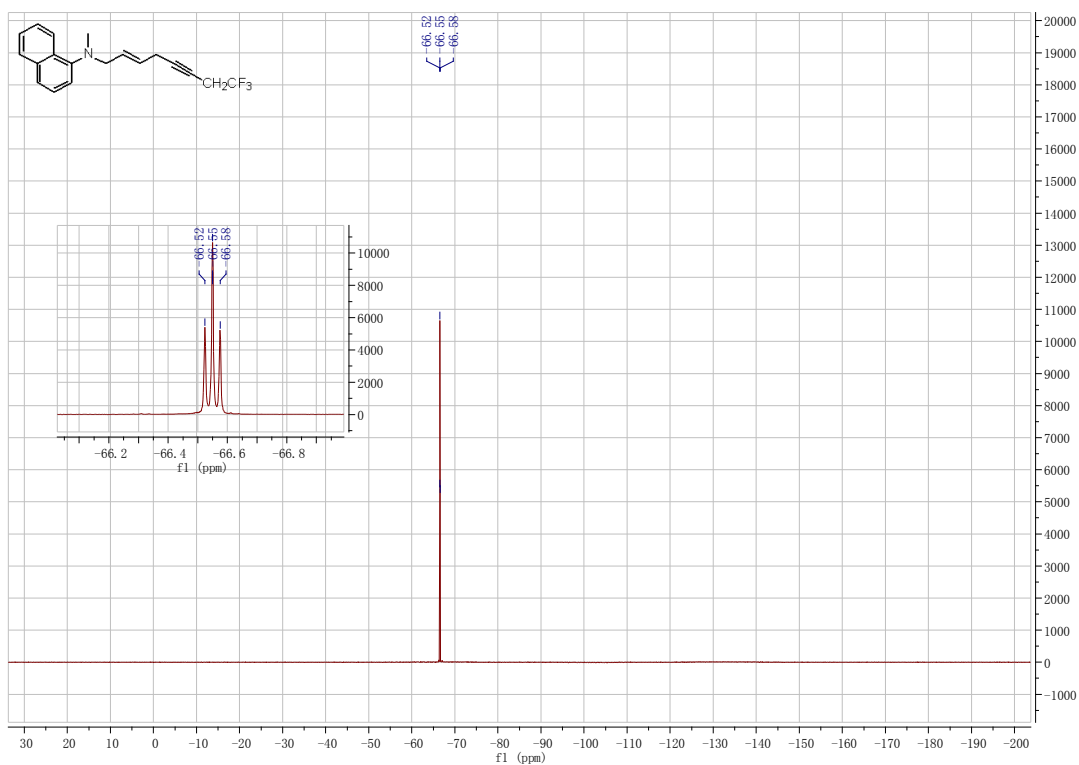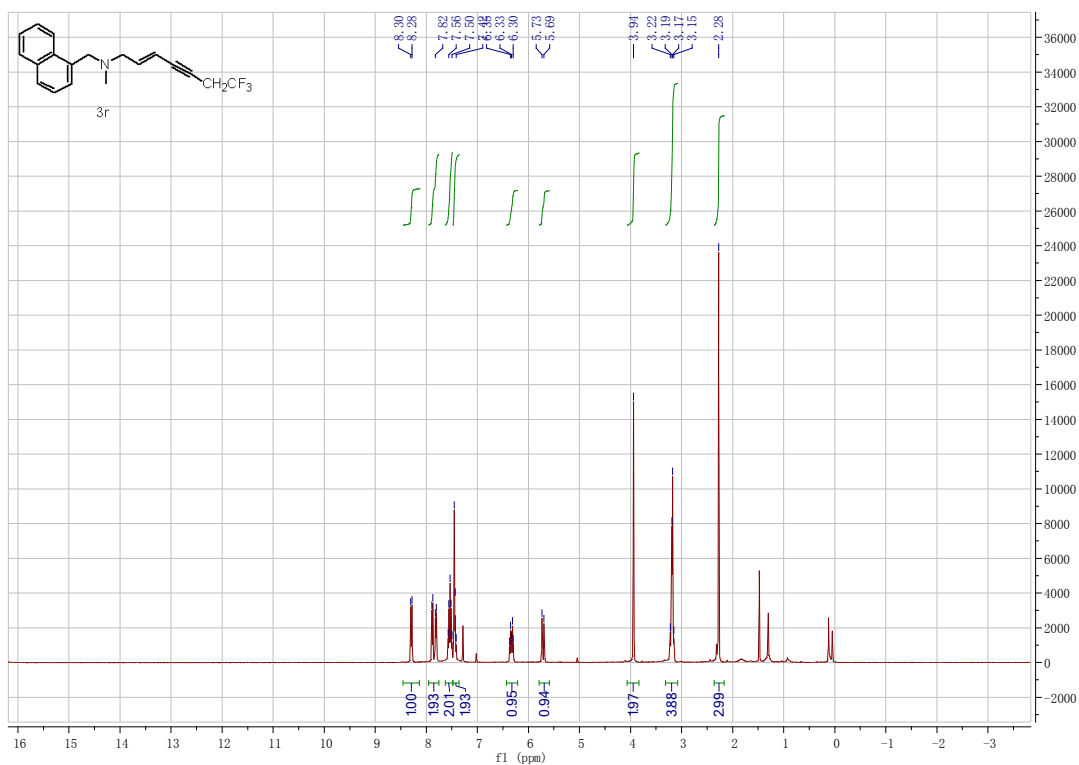

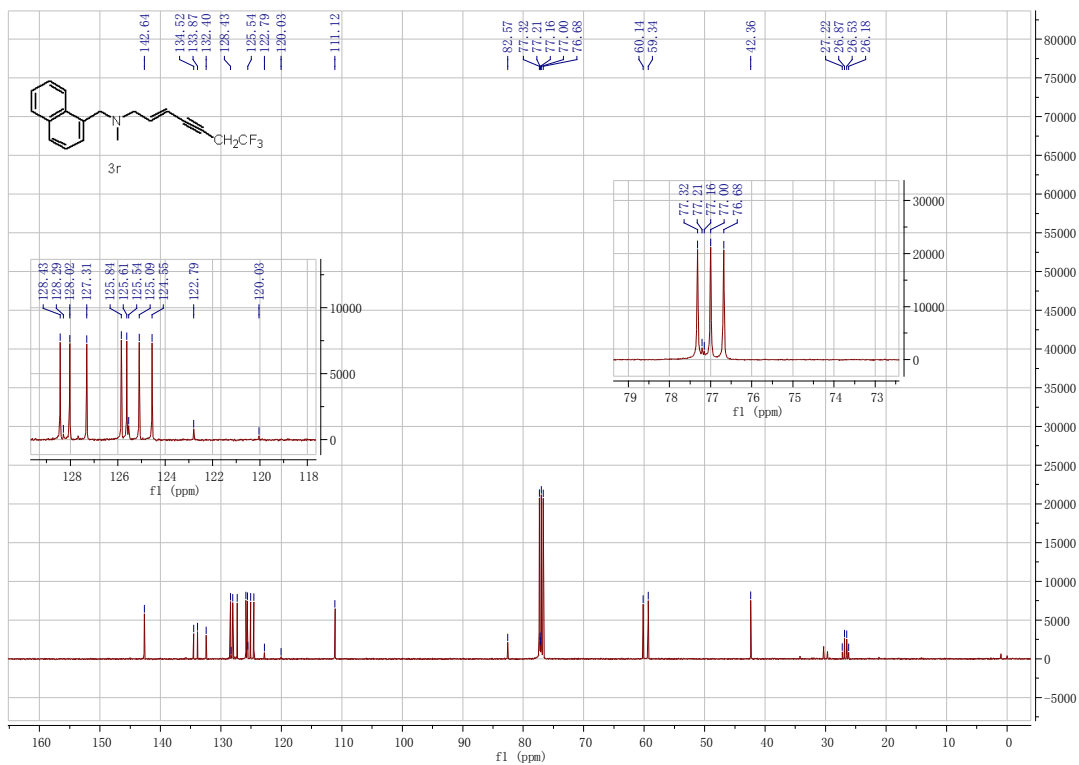

Supplement: c5qo00210a1.pdf [file c5qo00210a1.pdf]
